1 **Developing Cyclic Peptomers as Broad-Spectrum Gram negative Bacterial Type III**  
2 **Secretion System Inhibitors**

3

4

5 Running title: Broad-spectrum inhibitors of the Type III secretion system

6

7

8 Hanh N. Lam<sup>1#\*</sup>, Tannia Lau<sup>2\*</sup>, Adam Lentz<sup>1</sup>, Jessica Sherry<sup>3</sup>, Alejandro Cabrera-Cortez<sup>2</sup>,

9 Karen Hug<sup>1</sup>, Joanne Engel<sup>3</sup>, R. Scott Lokey<sup>2#</sup>, Victoria Auerbuch<sup>1</sup>

10

11

12 <sup>1</sup>Department of Microbiology and Environmental Toxicology, University of California  
13 Santa Cruz, Santa Cruz, CA 95064.

14 <sup>2</sup>Department of Chemistry and Biochemistry, University of California Santa Cruz, Santa  
15 Cruz, CA 95064.

16 <sup>3</sup>Department of Medicine, University of California San Francisco, San Francisco, CA  
17 94143.

18 \*Co-first authors

19

20

21 # Corresponding authors: [hanlam@ucsc.edu](mailto:hanlam@ucsc.edu), [slokey@ucsc.edu](mailto:slokey@ucsc.edu)

22 word count for abstract, and importance: 246 and 150, respectively

23 word count for the text: 3,384

24 **ABSTRACT**

25 Antibiotic resistant bacteria are an emerging global health threat. New antimicrobials are  
26 urgently needed. The injectisome type III secretion system (T3SS), required by dozens of  
27 Gram-negative bacteria for virulence but largely absent from non-pathogenic bacteria, is  
28 an attractive antimicrobial target. We previously identified synthetic cyclic peptomers,  
29 inspired by the natural product phepropeptin D, that inhibit protein secretion through the  
30 *Yersinia* Ysc and *Pseudomonas aeruginosa* Psc T3SSs, but do not inhibit bacterial  
31 growth. Here we describe identification of an isomer, 4EpDN, that is two-fold more  
32 potent (IC<sub>50</sub> 4 μM) than its parental compound. Furthermore, 4EpDN inhibited the  
33 *Yersinia* Ysa and the *Salmonella* SPI-1 T3SSs, suggesting that this cyclic peptomer has  
34 broad efficacy against evolutionarily distant injectisome T3SSs. Indeed, 4EpDN strongly  
35 inhibited intracellular growth of *Chlamydia trachomatis* in HeLa cells, which requires  
36 the T3SS. 4EpDN did not inhibit the unrelated Twin arginine translocation (Tat) system,  
37 nor did it impact T3SS gene transcription. Moreover, although the injectisome and  
38 flagellar T3SSs are evolutionarily and structurally related, the 4EpDN cyclic peptomer  
39 did not inhibit secretion of substrates through the *Salmonella* flagellar T3SS, indicating  
40 that cyclic peptomers broadly but specifically target the injectisome T3SS. 4EpDN  
41 reduced the number of T3SS basal bodies detected on the surface of *Y. enterocolitica*, as  
42 visualized using a fluorescent derivative of YscD, an inner membrane ring with low  
43 homology to flagellar protein FliG. Collectively, these data suggest that cyclic peptomers  
44 specifically inhibit the injectisome T3SS from a variety of Gram-negative bacteria,  
45 possibly by preventing complete T3SS assembly.

46 **IMPORTANCE**

47

48 Traditional antibiotics target both pathogenic and commensal bacteria, resulting in  
49 a disruption of the microbiota, which in turn is tied to a number of acute and chronic  
50 diseases. The bacterial type III secretion system (T3SS) is an appendage used by  
51 many bacterial pathogens to establish infection, but is largely absent from  
52 commensal members of the microbiota. In this study, we identify a new derivative of  
53 the cyclic peptomer class of T3SS inhibitors. These compounds inhibit the T3SS of  
54 the nosocomial ESKAPE pathogen *Pseudomonas aeruginosa* and enteropathogenic  
55 *Yersinia* and *Salmonella*. The impact of cyclic peptomers is specific to the T3SS, as  
56 other bacterial secretory systems are unaffected. Importantly, cyclic peptomers  
57 completely block replication of *Chlamydia trachomatis*, the causative agent of  
58 genital, eye, and lung infections, in human cells, a process that requires the T3SS.  
59 Therefore, cyclic peptomers represent promising virulence blockers that can  
60 specifically disarm a broad spectrum of Gram-negative pathogens.

61

62

## 63 INTRODUCTION

64

65 Antibiotic resistance is of great concern to global public health. Bacterial pathogens have  
66 evolved numerous mechanisms to survive treatment with clinically-available antibiotics  
67 (1). Alternative therapies against multidrug-resistant strains of so-called ESKAPE  
68 pathogens (*Enterococcus faecium*, *Staphylococcus aureus*, *Klebsiella*  
69 *pneumoniae*, *Acinetobacter baumannii*, *Pseudomonas aeruginosa*,  
70 and *Enterobacter* species) are urgently needed. Various strategies have been explored to  
71 avoid the antimicrobial apocalypse (2). One promising approach is to inhibit bacterial  
72 virulence mechanisms to disarm pathogens without affecting non-pathogenic members of  
73 the microbiota or environmental bacteria (3, 4). This approach has the potential to not  
74 only control infection but to do so in a way that preserves the integrity of the  
75 microbiome, which is beneficial for human health and is often the source of antibiotic  
76 resistance genes (5, 6).

77

78 The type III secretion system (T3SS), a needle-like injectisome apparatus, is required for  
79 virulence in many Gram-negative pathogens including *Salmonella*, *Yersinia*, *Chlamydia*  
80 and the ESKAPE pathogen, *P. aeruginosa*. The T3SS is largely absent from commensal  
81 bacteria, making it a good target for virulence blocker antimicrobials. Phylogenetic  
82 analysis suggests that T3SSs evolved from the flagellar system (7, 8). Indeed, the  
83 flagellar basal body is a secretion system, referred to as the flagellar T3SS, that secretes  
84 flagellin and other structural components into the extracellular space in order to build the  
85 flagellar filament to power motility. The flagellar and injectisome T3SS share a number

86 of conserved basal body and export apparatus components (9). However, the injectisome  
87 T3SS does not mediate motility, but instead delivers effector proteins into target host  
88 cells.

89

90 A number of small molecules, antibodies, and vaccines have been studied for T3SS  
91 targeted therapies (10). Despite showing promising effects on the T3SS *in vitro* and in  
92 animal models, only one antibody-based therapy has entered clinical trials. A bispecific  
93 antibody, MEDI3902, against the *P. aeruginosa* T3SS needle tip protein PcrV and the Psl  
94 exopolysaccharide is effective against both acute and chronic infection models and is in  
95 phase II clinical trials for prevention of ventilator-associated pneumonia (11, 12).

96

97 As narrow-spectrum antimicrobials require more precise diagnostics, broad-spectrum  
98 T3SS inhibitors would be more valuable clinically than those only able to target one  
99 bacterial species. In addition, most mammalian pathogens that utilize a T3SS only require  
100 their T3SS during growth within, but not outside, the host animal. However, *Chlamydiae*,  
101 which cause lung, genital, and eye infections, are obligate intracellular bacteria and their  
102 T3SS is strictly required for their growth (13). Interestingly, the *Chlamydia* T3SS belongs  
103 to its own T3SS family (7, 8). Here we identify a derivative of a synthetic cyclic  
104 peptomer family of T3SS inhibitors (14) that can inhibit the T3SS machinery of three  
105 evolutionarily distinct T3SS families used by five different bacterial species to cause  
106 human disease, including *Chlamydia trachomatis*.

107

108

109

## 110 RESULTS

111

### 112 Structure-activity relationship study of cyclic peptomers.

113 Previously we identified a group of cyclic peptomers that inhibited secretion of substrates  
114 from *Y. pseudotuberculosis* and *P. aeruginosa* T3SSs, but did not inhibit bacterial  
115 growth, motility, or HeLa cell metabolism (14). The results suggested a potential for  
116 development of these cyclic peptomers as pathogen-specific virulence blockers. Based on  
117 dose response curves and concentration of half maximal inhibition (IC<sub>50</sub>) of the *P.*  
118 *aeruginosa* T3SS, 1EpDN (previously named as EpD1,2N) was chosen for structure-  
119 activity relationship (SAR) analysis. Compounds used in SAR analysis are listed in Table  
120 1.

121

122 We first assessed the effect of alanine replacement at each of the six positions of the  
123 parent scaffold, 1EpDN. Note that because peptoids have side chains appended to a  
124 nitrogen atom rather than carbon as in amino acids, positions 1 and 2 were synthesized  
125 with N-methylglycine, also known as sarcosine (Sar), as the peptoid equivalent of alanine  
126 (Ala). Ala or Sar replacement at any of the six positions resulted in significant loss of  
127 activity, suggesting that all side chains contribute to the activity (Fig. S1). Next, we  
128 carried out a stereochemistry scan, in which different combinations of L- and D-amino  
129 acids at positions 3 to 6 were generated. The parent compound, 1EpDN, has  
130 **P**ropylamine, and **B**enzylamine at positions 1 and 2, and **D**-Leu, **L**-Ile, **L**-Leu, and **D**-Phe  
131 at positions 3-6. For the stereochemistry scan, we will refer to 1EpDN as PBDLLD.

132 While most stereoisomers had the same or reduced T3SS inhibitory activity, 4EpDN  
133 (PBLDD) showed improved activity, with an IC<sub>50</sub> of ~4μM compared to the parent  
134 compound IC<sub>50</sub> of ~8μM (Fig. 1A-B). Replacement of position 1 (4EpDN 1Sar) or  
135 position 2 (4EpDN 2Sar) with Sar significantly reduced activity of 4EpDN (Fig. 2A-B).  
136 4EpDN and 4EpDN 2Sar were used as an active compound and a negative control,  
137 respectively, in most follow-up experiments.

138

### 139 **Cyclic peptomers inhibit secretion of T3SS substrates from the Inv-Mxi-Spa T3SS** 140 **family, but does not inhibit secretion through the flagellar T3SS.**

141 Based on phylogenetic analysis of core T3SS proteins, T3SSs were classified into seven  
142 families (7, 8). However, T3SSs have many highly conserved structural components (9).  
143 T3SS genes are typically encoded on virulence plasmids or pathogenicity islands,  
144 indicative of horizontal gene transfer (15); therefore, phylogeny of T3SSs does not follow  
145 organismal phylogeny. We previously showed that cyclic peptomers inhibited the Ysc  
146 T3SS family found in *P. aeruginosa* and *Yersinia* (Fig. 1-2) (14). In order to test whether  
147 cyclic peptomers are active against other T3SS families, we evaluated the effect of cyclic  
148 peptomers on the Inv-Mxi-Spa T3SS in *Y. enterocolitica* and *Salmonella enterica* serovar  
149 Typhimurium.

150

151 The *Y. enterocolitica* Ysa system, a chromosomally encoded T3SS, is distinct from the  
152 *Yersinia* Ysc T3SS and contributes to *Y. enterocolitica* colonization of the terminal ileum  
153 and gastrointestinal system associated tissues (16, 17). A *Y. enterocolitica* mutant that  
154 lacks expression of the Ysa T3SS ( $\Delta ysaT$ ) was used as a negative control, while a mutant

155 lacking the Ysc T3SS ( $\Delta yscL$ ) (18) was used to evaluate the effect of compounds  
156 specifically on the Ysa system. Secretion of the Ysa effector protein YspF was  
157 quantified. 4EpDN inhibited secretion of YspF in a dose dependent manner, while  
158 4EpDN 2Sar did not affect its secretion (Fig. 3). Together, these results suggest that  
159 cyclic peptomers are active against both the Ysc and Ysa T3SSs in *Yersinia*.

160

161 In order to evaluate whether the cyclic peptomers are active against T3SSs distinct from  
162 the Ysc T3SS outside the *Yersinia* genus, we tested cyclic peptomer efficacy in  
163 *Salmonella*. *Salmonella* employs two T3SSs during infection, with the SPI-1 T3SS  
164 belonging to the Inv-Mxi-Spa T3SS family (7, 8). Inhibition of SPI-1 T3SS effector  
165 protein SipC and SipA (19-21) secretion by 4EpDN was observed at  $\sim 1 \mu\text{M}$  and  $\sim 1.4$   
166  $\mu\text{M}$ , respectively, while 4EpDN 2Sar showed inhibition of SipC and SipA secretion only  
167 at concentrations greater than  $30 \mu\text{M}$  (Fig. 4). In order to test whether inhibition of  
168 secretion by the cyclic peptomers in *Salmonella* could be affected by aggregation of the  
169 compounds, we also evaluated secretion in the presence of detergent. The presence of  
170 Tween-20 (0.003%, Fig. S2) did not reduce activity of 4EpDN (Fig. 4), suggesting that  
171 aggregation of cyclic peptomers does not affect its activity.

172

173 As 4EpDN inhibited both the Ysc and Inv-Mxi-Spa T3SS families, we tested whether this  
174 cyclic peptomer could inhibit the flagellar T3SS, which is the most distantly related T3SS  
175 based on previous phylogenetic analysis (7). Conveniently, *Salmonella* expresses the SPI-  
176 1 and its flagellar system under the same conditions *in vitro* (rich media). This allowed us  
177 to investigate effects of cyclic peptomers on both the SPI-1 T3SS and flagellar systems



178 under the same culture conditions. Because of the conservation between the injectisome  
179 and flagellar T3SSs, flagellar substrates can be secreted through both systems. Therefore,  
180 secretion of flagellar substrates (FliC and FliD) was quantified in both WT and  $\Delta$ SPI-1  
181 strains to distinguish secretion through both the SPI-1 T3SS and flagellar system (WT  
182 strain) or only through the flagellar system ( $\Delta$ SPI-1 strain). 4EpDN inhibited FliC and  
183 FliD secretion in WT *Salmonella* at concentrations of  $\geq 60 \mu\text{M}$  and  $\geq 3.75 \mu\text{M}$ ,  
184 respectively (Fig. S3), consistent with the ability of the SPI-1 T3SS being able to secrete  
185 flagellar substrates. However, 4EpDN only inhibited FliC and FliD secretion at high  
186 concentrations ( $\geq 60 \mu\text{M}$ ) in the  $\Delta$ SPI-1 mutant, with unfavorable dose response curves  
187 compared to WT *Salmonella*. This suggests that the inhibitory effect of 4EpDN on FliD  
188 secretion in the WT strain was mainly through inhibition of its secretion through the SPI-  
189 1 T3SS. 4EpDN 2Sar had no significant effect on FliC secretion or FliD secretion. These  
190 data suggest that the cyclic peptomer 4EpDN does not significantly inhibit substrate  
191 secretion through the flagellar T3SS in *Salmonella* but strongly inhibits the SPI-1 T3SS  
192 under the same conditions.

193

#### 194 **Cyclic peptomers affect the T3SS basal body.**

195 The T3SS basal body must be assembled prior to T3SS substrate secretion (22-24). In  
196 *Yersinia*, the T3SS basal body component YscD is an inner ring protein that is conserved  
197 among injectisome T3SSs, but has low sequence homology with the flagellar ortholog  
198 FliG (9). Absence of YscD at the inner membrane prevents assembly of other T3SS  
199 machinery (YscL, YscK, YscQ) (23, 25), and secretion of T3SS substrates (26). We used  
200 a *Y. enterocolitica* strain expressing a YscD allele translationally fused with EGFP to

201 visualize the effect of compounds on YscD assembly (23). 4EpDN caused reduction in  
202 the number of YscD puncta, although not to the levels seen under non-T3SS inducing  
203 conditions (high  $\text{Ca}^{2+}$ ), while the inactive isomer 4EpDN 2Sar had no effect (Fig. 5).  
204 These data suggest that cyclic peptomers affect the assembly or stability of the T3SS  
205 basal body, ultimately dampening secretion of effector proteins.

206

### 207 **Cyclic peptomers do not inhibit T3SS gene expression.**

208 As cyclic peptomers inhibit substrate secretion and basal body assembly on the bacterial  
209 membrane, we evaluated the effect of cyclic peptomers on T3SS gene expression, as this  
210 step occurs prior to T3SS assembly. Interestingly, 1EpDN did not inhibit transcription of  
211 *exoT* while phenoxyacetamide MBX1641 did (Fig. 6A). Expression of the *dsbA* gene,  
212 whose product was shown to be required for expression of the T3SS (27), was unchanged  
213 following either cyclic peptomer or the phenoxyacetamide treatment (Fig. 6A). Similarly,  
214 4EpDN did not affect expression of the effectors *exoS* and *exoT* in a strain of *P.*  
215 *aeruginosa* lacking all known efflux pumps (28) (Fig. 6B). In contrast, MBX1641  
216 strongly reduced expression of both *exoS* and *exoT* in this strain. These data suggest that  
217 cyclic peptomers do not block T3SS activity by blocking T3SS expression.

218

219 In *P. aeruginosa*, secretion and transcription are coupled through a negative regulator  
220 ExsE (29). Secretion of ExsE allows transcription of T3SS genes by the *Pseudomonas*  
221 regulator ExsA (29). We evaluated the impact of cyclic peptomers on secretion of ExsE  
222 and the effector ExoS by Western Blot. Both 1EpDN and 4EpDN significantly reduced  
223 the amount of secreted ExoS, with a concomitant accumulation of ExoS in the bacterial

224 cytosol (Fig. 7). In contrast, we did not observe any decrease in secreted ExsE and could  
225 not detect any cytosolic ExsE (data not shown). These data suggest that cyclic peptomers  
226 block effector protein secretion but not secretion of T3SS regulators.

227

228 **Cyclic peptomers do not inhibit secretion through the Twin-arginine translocation**  
229 **(Tat) system.**

230 In order to determine if cyclic peptomers inhibit the activity of secretion systems  
231 completely unrelated to the T3SS, we sought to assess the impact of cyclic peptomers on  
232 the Twin arginine translocation (Tat) system in *Y. pseudotuberculosis*. The Tat system  
233 translocates fully folded substrates across the inner membrane, while the T3SS  
234 translocates partially unfolded substrates across the inner, outer, and target host cell  
235 membranes (30). To monitor Tat secretion system activity, a reporter strain expressing an  
236 IPTG-inducible  $\beta$ -lactamase TEM-1 domain fused to the signal peptide of the SufI Tat  
237 substrate (31) was constructed. Following IPTG induction,  $\beta$ -lactamase confers resistance  
238 to the  $\beta$ -lactam peptidoglycan-targeting antibiotic penicillin G when the SufI- $\beta$ -lactamase  
239 reporter has successfully translocated into the periplasm (Fig. 8A). The presence of  
240 known Tat inhibitors, Bay 11-7082 or N-phenylmaleimide (32), strongly reduced growth  
241 of bacteria after four and six hours, while growth of bacterial cultures treated with cyclic  
242 peptomers were similar to the DMSO control (Fig. 8B,C). These results suggested that  
243 4EpDN does not inhibit the Tat secretion system.

244

245 **Cyclic peptomers block *Chlamydia* infection.**

246 Our data point to the cyclic peptomer 4EpDN being able to inhibit multiple T3SS  
247 injectisome families but not other secretion systems, indicating a broad yet specific  
248 activity. In order to evaluate whether this cyclic peptomer can disarm virulence, we chose  
249 to examine the effect of this compound on the *Chlamydia* infection, as this pathogen  
250 requires the T3SS for infection and growth within human cells. The *Chlamydial* life cycle  
251 involves two major bacterial forms: the extracellular infectious Elementary Bodies (EBs),  
252 and the intracellular replicative Reticulate Bodies (RBs). Upon entry, EBs discharge  
253 preloaded T3SS effectors and are taken up into a membrane-bound compartment (the  
254 inclusion) where they differentiate into RBs, secrete additional T3SS effectors and  
255 replicate, and then re-differentiate into EBs. Initial stages of infection were assessed by  
256 quantifying the number of inclusions/cell at 24 hpi in the presence of 9  $\mu$ M cyclic  
257 peptomers or DMSO; a decrease in inclusion number or size suggests inhibition of  
258 binding, entry, EB-RB differentiation, or replication. Production of infectious progeny,  
259 which assays RB-EB re-differentiation (including production of pre-packaged effectors)  
260 and/or release of EBs, was assayed by collecting EBs at 48 hpi, and infecting fresh  
261 monolayers for 24 hpi, and then quantifying inclusion formation. INP0400, a known  
262 T3SS inhibitor was used as a control (33). 4EpDN but not 4EpDN 2Sar decreased  
263 primary inclusion formation ~50% but inhibited formation of infectious progeny ~98%,  
264 without affecting host cell viability as assayed by LDH release (Fig. 9). Together, these  
265 results suggest that 4EpDN may predominantly inhibit production or secretion of pre-  
266 packaged *C. trachomatis* effectors rather than those made during RB replication.

267

268 **DISCUSSION**

269 In this study we further developed cyclic peptomers as T3SS inhibitors and investigated  
270 their effects on various virulence mechanisms and pathogens. A newly synthesized cyclic  
271 peptomer derivative, 4EpDN, exhibited an  $IC_{50}$  in the low  $\mu M$  range. 4EpDN inhibits  
272 secretion through the T3SS of a number of pathogens including the nosocomial ESKAPE  
273 pathogen *Pseudomonas aeruginosa*, enteropathogenic *Yersinia*, *Salmonella* and the  
274 obligate intracellular pathogen *Chlamydia trachomatis*. 4EpDN does not inhibit secretion  
275 from two other secretion systems – the flagellar T3SS and the Tat secretion system.  
276 Cyclic peptomers do not inhibit T3SS gene expression, but affect localization of the  
277 T3SS basal body component YscD, indicating disruption of normal T3SS assembly.  
278 These data suggest that cyclic peptomers specifically inhibit the injectisome T3SS in a  
279 broad spectrum of pathogens.

280

281 **Structure activity relationship analysis resulted in a T3SS inhibitor with an  $IC_{50}$  in**  
282 **the low  $\mu M$  range.** Through alanine and stereochemistry scans, we identified 4EpDN, a  
283 cyclic peptomer with an  $IC_{50}$  of 4  $\mu M$ , as inhibiting secretion of T3SS effector proteins in  
284 *P. aeruginosa* and 1  $\mu M$  in inhibiting the *Salmonella* SPI-1 T3SS. Compared to  
285 previously published T3SS inhibitors (Table 2), this low  $\mu M$  activity is encouraging. The  
286 only published T3SS inhibitors with comparable  $IC_{50}$  are the phenoxyacetamides (MBX  
287 2359 and its optimized derivatives), which inhibit *P. aeruginosa* T3SS secretion at 1-3  
288  $\mu M$  (28). Stereoisomers of 1EpDN showed a wide range of potencies, suggesting that  
289 differences in their three dimensional structures affect their biological activity. 9EpDN is  
290 a true enantiomer of 1EpDN with an  $IC_{50}$  of  $\sim 13 \mu M$ , a lower potency than the 1EpDN  
291 parental compound of  $\sim 8 \mu M$ . Importantly, the activity of these isomers do not positively

292 correlate with solubility (Fig. S4), indicating that the observed activity is due to a specific  
293 molecular reaction rather than a non-specific biophysical effect due to aggregation.  
294 Furthermore, the presence of nonionic detergent did not affect activity of compounds  
295 (Fig. 4). Moreover, 4EpDN is potent at concentrations significantly lower than its  
296 solubility (Table S1). These data suggest that 4EpDN is an active cyclic peptomer with  
297 specific T3SS inhibitory activity.

298

299 **Cyclic peptomers act as broad-spectrum, but specific, inhibitors of the injectisome**  
300 **T3SS.** Secretion of protein substrates through the injectisome T3SS, the flagellar system,  
301 and the Tat secretion system require the proton motive force (34-36). Although cyclic  
302 peptomers inhibited secretion from the injectisome T3SS, they did not inhibit the Tat  
303 system and only weakly inhibited flagellar substrate secretion, suggesting that the proton  
304 motive force is unaffected, as we previously suggested (14), and that the cyclic  
305 peptomers do not inhibit bacterial secretion in general.

306

307 The 4EpDN cyclic peptomer demonstrated efficacy against the T3SSs of *P. aeruginosa*,  
308 *Y. pseudotuberculosis*, *Y. enterocolitica*, *Salmonella enterica* Typhimurium, and  
309 *Chlamydia trachomatis*, with an IC<sub>50</sub> in the range of 1 μM (for the *Salmonella* SPI-1  
310 T3SS) to ~16 μM (for the *Y. pseudotuberculosis* Ysa T3SS) (Table 2). Based on  
311 phylogenetic analysis of core T3SS proteins, T3SSs group into seven T3SS families, five  
312 of which contain T3SSs from human pathogens (37). 4EpDN has efficacy against T3SSs  
313 from three of these T3SS families: the Ysc (Ysc and Psc), Inv-Mxi-Spa (SPI-1 and Ysa),  
314 and *Chlamydiales*. Interestingly, the flagellar ATPase from *E. coli* falls at the root of the

315 phylogenetic tree (38), distinct from other T3SS families. As 4EpDN impacted secretion  
316 through the flagellar T3SS significantly less than through the injectisome T3SS in the  
317 same bacterial species and under the same culture and experimental conditions, we  
318 reason that the pathway targeted by cyclic peptomers is common to all injectisome T3SSs  
319 but absent from the flagellar system.

320

321 **Cyclic peptomers decrease cell envelope localization of the T3SS basal body protein**  
322 **YscD and inhibit secretion of T3SS effector proteins, but do not inhibit T3SS gene**  
323 **expression.** The T3SS is a complex system made of ~20 different proteins and is  
324 assembled in a hierarchical manner prior to secretion of effector proteins (22, 39). Our  
325 study showed that 4EpDN inhibited secretion of T3SS effector proteins in *Yersinia*,  
326 *Pseudomonas*, and *Salmonella* and blocked *Chlamydial* growth, which requires  
327 translocation of T3SS effector proteins in human cells. Importantly, 4EpDN did not  
328 decrease expression of T3SS genes in *Pseudomonas* or *Salmonella* (Fig. 6, Fig. S5),  
329 suggesting that cyclic peptomers do not act at the level of T3SS gene expression.  
330 However, the T3SS of *Yersinia*, *Pseudomonas*, *Salmonella*, and *Chlamydia* share a  
331 number of orthologous basal body components that, if targeted, could lead to disruption  
332 of effector protein secretion. Interestingly, 4EpDN reduced localization of the inner  
333 membrane ring protein YscD to the *Yersinia* cell envelope (Fig 3), indicating a  
334 perturbation to T3SS assembly or stability.

335

336 Surprisingly, the effect of 4EpDN on the T3SS did not significantly impact secretion of  
337 the *Pseudomonas* regulator ExsE. In *P. aeruginosa*, ExsA is the key positive

338 transcriptional regulator of genes encoding the T3SS machinery and substrates. ExsE  
339 leads to sequestration of ExsA, preventing it from inducing T3SS gene expression  
340 through a complex partner switching pathway (29, 40, 41). Under secreting conditions,  
341 ExsE, a T3SS substrate, is secreted, enabling release of ExsA and thereby allowing  
342 increased transcription of T3SS genes (29). However, we did not detect a decrease in  
343 ExsE secretion in the presence of cyclic peptomers, in contrast to the marked decrease in  
344 effector protein secretion. These results are consistent with the data showing that 4EpDN  
345 did not inhibit T3SS gene expression in *P. aeruginosa*, as ExsE mediates elevation of  
346 gene expression in response to secretion. It is not completely clear why the cyclic  
347 peptomers inhibited secretion of effector substrates and ExsE differently, although the  
348 small size of ExsE compared to other effectors such as ExoU (~8.7 kDa versus 74 kDa)  
349 may be a factor.

350

351 **Cyclic peptomers strongly inhibit *Chlamydia* primary and secondary infection.**  
352 4EpDN strongly inhibited *Chlamydia* from infecting HeLa cells during primary infection,  
353 and furthermore prevented *Chlamydia* from infecting subsequent host cells (Fig. 9). This  
354 highlights the potential of cyclic peptomers to prevent the spread of *Chlamydia* infection.  
355 *Chlamydia* relies on its T3SS effector proteins to interact with host factors, such as the  
356 actin cytoskeleton, Golgi network, endoplasmic reticulum, and microtubule network, to  
357 mediate invasion and intracellular growth (42). It is possible that compounds that inhibit  
358 these host pathways could interfere with *Chlamydial* growth (43-45). However,  
359 microscopic analysis of many cellular structures in HeLa cells in the presence of 4EpDN  
360 did not show any gross changes to the actin cytoskeleton, Golgi network, endoplasmic



361 reticulum, or microtubule network at the concentration used in our *Chlamydia* infection,  
362 9  $\mu$ M (Fig. S6). *C. trachomatis* infection may cause infertility in female patients and eye  
363 damage, in addition to lung infections (13). Antibiotics, such as  $\beta$ -lactam antibiotics, are  
364 a common way to treat *Chlamydia* infection, but the chance of recurrence is high (46,  
365 47). Current vaccine development efforts are underway but multiple challenges remain  
366 (48). There is increased demand for drugs against *Chlamydia* due to antibiotic resistance  
367 (49). The strong efficacy of cyclic peptomers highlights their potential for development  
368 as an anti-*Chlamydial* drug.

369

## 370 MATERIALS AND METHODS

371 **Bacterial strains and culture conditions.** The bacterial strains and cell lines used in this  
372 study are listed in Table 3. All cultures were grown with shaking at 250 rpm unless  
373 otherwise noted. *Y. pseudotuberculosis* was grown in 2xYT (2x yeast extract and  
374 tryptone) at 26°C overnight. To induce the T3SS, the cultures were subcultured to an  
375 optical density at 600 nm (OD<sub>600</sub>) of 0.2 into low-calcium medium (2xYT with 20 mM  
376 sodium oxalate and 20 mM MgCl<sub>2</sub>). *Y. enterocolitica* was grown in BHI (brain heart  
377 infusion) medium at 26°C overnight. The Ysc T3SS in *Y. enterocolitica* was induced  
378 using low-calcium BHI (BHI with 20 mM sodium oxalate and 20 mM MgCl<sub>2</sub>). The Ysa  
379 T3SS was induced as described previously (50) using ‘L media’ (1% Tryptone, 0.5%  
380 Yeast extract) with 290 mM NaCl at 26°C. *P. aeruginosa* and *S. enterica* were grown in  
381 Luria-Bertani (LB) medium overnight at 37°C. For *P. aeruginosa*, the T3SS was induced  
382 using low-calcium medium (LB with 5 mM EGTA and 20 mM MgCl<sub>2</sub>). SPI-1 T3SS  
383 secretion was assessed after subculturing into fresh LB at 37°C unless noted otherwise.

384 HeLa cells (ATCC) were cultured in Dulbecco's modified Eagle's medium (DMEM)  
385 with 10% fetal bovine serum (FBS). All cell lines were incubated at 37°C with 5% CO<sub>2</sub>.

386

387 **Preparation of bacteria for T3SS induction.** Visualization of secreted proteins was  
388 carried out as described previously (25). Briefly, *Y. pseudotuberculosis*, *P. aeruginosa*, or  
389 *S. enterica* was grown in T3SS-inducing medium (as described above) in the presence of  
390 cyclic peptomers or an equivalent volume of DMSO at 37°C, 2 hrs for *Y.*  
391 *pseudotuberculosis* Ysc T3SS, 3 hrs for *P. aeruginosa*, 4 hrs for *S. enterica*, or at 26°C  
392 for 6 hrs for the *Y. enterocolitica* Ysa T3SS. The cultures were normalized to bacterial  
393 density (OD<sub>600</sub>) and then centrifuged for 15 min at 14,800 rpm. The supernatants were  
394 transferred to new tubes and mixed with trichloroacetic acid (TCA) to a final volume of  
395 10% by vortexing vigorously for 30 s. Samples were incubated on ice for 1 hr and then  
396 spun down at 4°C for 15 min at 13,200 rpm. The supernatants were carefully removed,  
397 and pelleted proteins washed with acetone and spun down at 4°C for 15 min at 13,200  
398 rpm for a total of three washes. The pellet was then resuspended in final sample buffer  
399 (FSB) and 20% dithiothreitol (DTT) and boiled for 15 min prior to SDS-PAGE. Tween-  
400 20 was added to the bacterial culture at the same time as the compounds in *S. enterica*  
401 secretion assays at 0.003% (v/v).

402

403 **T3SS secretion cargo quantification.** Image Lab software (Bio-Rad) was used to  
404 quantify T3SS cargo protein bands relative to those of DMSO-treated controls. The WT  
405 *Y. pseudotuberculosis* YopE, *P. aeruginosa* ExoU, or *S. enterica* SipA, SipC, FliC and  
406 FliD bands in DMSO control samples were set to 1.00. To evaluate type III secretion of

407 ExoS and ExsE in *P. aeruginosa*, Western blots against T3SS cargo were carried out,  
408 using a PVDF membrane (Millipore), blocking in 5% non-fat milk for 2 hrs at room  
409 temperature, and incubated at 4°C overnight with gentle shaking. Blots were washed  
410 three times for 5 minutes each in Phosphate-Buffered Saline with 0.1% Tween® 20  
411 (PBST). Horseradish Peroxidase conjugated secondary antibody was then incubated for 1  
412 hr at room temperature. Signals were detected with Luminol Kit after washing. ExoS-Bla,  
413 ExsE and SipC was visualized using  $\beta$ -lactamase (MA120370, Fisher Scientific) (7.5%  
414 gel), anti-ExsE antibody courtesy of Timothy Yahr (20% gel) and anti-SipC  
415 (ABIN335178, antibodies-online Inc.)(10% gel), respectively.

416

417 **YscD visualization assay.** *Y. enterocolitica* expressing YscD-EGFP was cultured  
418 overnight in BHI supplemented with nalidixic acid (35  $\mu$ g/mL) and diaminopimelic acid  
419 (50  $\mu$ g/mL), at 26°C with shaking (23), followed by subculture into low calcium BHI  
420 medium (20mM NaOX, 20mM MgCl<sub>2</sub>, 0.4% Glycerol) with nalidixic acid and  
421 diaminopimelic acid to OD<sub>600</sub> of 0.2 for 1.5 hrs. Compounds or an equivalent volume of  
422 DMSO was added prior to inducing the T3SS. After 3 hrs at 37°C with shaking, cells  
423 were pelleted and resuspended in PBS, spotted onto a 0.1% agarose pad, and imaged live  
424 at 63X/1.4 oil magnification using a Zeiss AxioImager widefield microscope. Analysis of  
425 YscD puncta was carried out in Imaris 8 using spot tracking analysis with the same  
426 arbitrary threshold to call bacterial cell and puncta for all samples.

427

428 **mRNA quantification.** Overnight *P. aeruginosa* (PA103 or PA01) cultures were  
429 subcultured and shifted to T3SS inducing conditions (see above) in the presence of 60

430  $\mu\text{M}$  1EpDN, 60  $\mu\text{M}$  1EpDN 2Sar, or 50  $\mu\text{M}$  MBX1641. Samples were taken after 3 hrs of  
431 induction. Overnight *Salmonella* cultures were subcultured into fresh LB with 0.3 M  
432 NaCl at 37°C in the presence of 9  $\mu\text{M}$  4EpDN, 4EpDN 2Sar, or equivalent DMSO.  
433 Samples were taken after 2 hrs and 4 hrs of induction. Samples were stored in  
434 RNAprotect reagent (Qiagen) and processed within a week. Total RNA was isolated  
435 using an RNAeasy Kit (Qiagen), according to the manufacturer's instructions, followed  
436 by two rounds of Turbo DNase (ThermoFisher scientific) treatment. A total of 2  $\mu\text{g}$  of  
437 RNA was used to make cDNA and qPCR reactions were run with SYBR Green PCR  
438 master mix (Applied Biosystems). DNA helicase (*dnaB*) and 16S rRNA genes were used  
439 as a reference for *P. aeruginosa* and *Salmonella* samples, respectively. Two to three  
440 technical replicates were averaged for each sample. Primers used are listed in Table S2.  
441 Results were analyzed using Bio-Rad CFX software.

442

443 **Tat translocation assay.** To make Tat targeting constructs, plasmid pMMB67EH  
444 (ATCC 37622) was digested with KpnI. TEM1 of  $\beta$ -lactamase was PCR amplified from  
445 *yopH*-Bla (courtesy of Melanie Marketon) using primers oHL210 and oHL217 (Table  
446 S2) and *sufI* signal peptide DNA was PCR amplified from genomic DNA of *Y.*  
447 *pseudotuberculosis* with primers oHL218 and oHL219 (Table S2). The digested  
448 pMMB67EH, TEM1 and *sufI* signal peptide DNA were assembled into a plasmid (*sufI*-  
449 Bla) using Gibson assembly.

450

451 WT *Yersinia* or *tatB::Tn* carrying *sufI*-Bla was grown in 2 x YT supplemented with  
452 15 $\mu\text{g}/\text{mL}$  gentamicin at 26°C with shaking. Overnight cultures were subcultured to OD<sub>600</sub>

453 of 0.1 and grown for 1.5hr at 26°C with shaking. 5 mM IPTG was added to the culture for  
454 0.5 hrs to allow for expression and translocation of SufI-Bla. Penicillin G (25µg/mL) was  
455 added to the cultures. Cultures were then treated with cyclic peptomers or DMSO and  
456 OD<sub>600</sub> measured every hour up to 8hrs.

457

458 ***Chlamydia* infection and imaging.** Primary Infections: HeLa cell monolayers were  
459 infected with *C. trachomatis*, Serovar L2 at an MOI of one in the presence of one of the  
460 following compounds at 9 µM: (a) DMSO, (b) 4EpDN, or (c) 4EpDN 2Sar. Cells were  
461 incubated for 24 hrs in the presence of the above compounds at 37°C, and then fixed with  
462 4% Paraformaldehyde (PFA). Cells were stained for IncA (*Chlamydia* inclusion  
463 membrane marker), DNA, and MOMP (*Chlamydia* major outer membrane protein). The  
464 percentage of cells infected (i.e. stained positively for the listed *Chlamydia* markers) in  
465 the presence of the compounds was quantified using confocal microscopy. 10 randomly  
466 selected fields of view were measured per experiment. Data represents three biological  
467 replicates.

468

469 Secondary Infections: HeLa cell monolayers were infected with *C. trachomatis*, Serovar  
470 L2 at an MOI of 1.0 in the presence of one of the following compounds at 9 µM: (a)  
471 DMSO, (b) 4EpDN, or (c) 4EpDN 2Sar. Cells were incubated for 48 hrs in the presence  
472 of the above compounds at 37°C. Infected cells were then lysed, and the lysate was  
473 applied to fresh HeLa monolayers to enumerate infectious particles. These secondary  
474 infections were fixed in 4% PFA at 24 hpi, and were stained against MOMP and DNA.  
475 Infectious units per mL (IFU/mL) were calculated by averaging the number of infected

476 cells in each of 10 randomly selected fields of view at 60X magnification on a confocal  
477 microscope, and multiplying this by the appropriate dilution and area factors. Data  
478 represents four biological replicates.

479

480 **Cytological Profiling (CP).** Briefly, HeLa cells were cultured and seeded into 384-well  
481 at 2,500 cells/well. After 48 hrs, compounds were added using a Janus MDT robot  
482 (PerkinElmer). Two stain sets were used; Stain set 1: Hoechst, EdUrhodamine, anti-  
483 Phosphohistone H3, and GM130, Stain Set 2: Hoechst, FITC-alpha tubulin, rhodamine-  
484 phalloidin, and Calnexin. For stain set 1, cells were incubated with 20  $\mu$ M  
485 EdUrhodamine for 1 hr prior to fixing in 4% formaldehyde solution in PBS for 20 min.  
486 Cells were then washed with PBS and permeabilized with 0.5 % Triton-X in PBS for 10  
487 min before blocking with 2 % BSA in PBS solution for at least 1 hr. Following this, cells  
488 were incubated with primary antibodies overnight at 4°C. The following day, excess  
489 primary antibody was washed off with PBS and Alexa-488 and Alexa-647 secondary  
490 antibodies and Hoechst solution were incubated for 1 hr. Plates were washed with PBS  
491 and preserved with 0.1% sodium azide in PBS solution prior to imaging. For stain set 2,  
492 cells were fixed with a 4 % formaldehyde solution in PBS for 20 min. Cells were then  
493 washed with PBS and permeabilized with 0.5 % Triton-X in PBS for 10 min before  
494 blocking with 2 % BSA in PBS solution for at least 1 hr. Following this, cells were  
495 incubated with primary antibodies overnight at 4°C. After blocking, the cells were  
496 washed, and incubated with FITC conjugated anti-alpha tubulin antibody and rhodamine-  
497 phalloidin overnight at 4°C. The following day the cells were washed and then incubated  
498 with secondary Alexa-647 and Hoechst stain for 1 hr. Plates were washed with PBS and

499 preserved with 0.1% sodium azide in PBS solution prior to imaging.

500

501 Two images per well were captured with an ImageXpress Micro XLS automated  
502 epifluorescent microscope (Molecular Devices, Sunnyvale). Images were then processed  
503 as described (51). Briefly, initial image processing was performed using MetaXpress  
504 image analysis software, using built-in morphometry metrics, the multiwavelength cell  
505 scoring, transfluor, and micronuclei modules. Custom written scripts were used to  
506 compare the treated samples with the DMSO control wells, and then to convert each  
507 feature to a “histogram difference” (HD) score. This produced a 452-feature vector CP  
508 fingerprint. Compound treatment wells were labeled as dead if the cell count for the  
509 treatment well was < 10% of the median cell count in the treatment plate. In addition to  
510 the CP fingerprint, feature cell counts (nuclei, EdU S-phase, and phospho-histone H3)  
511 were used to determine effects of compounds on HeLa cell replication.

512

### 513 **Synthesis of cyclic peptomers**

514 **Cyclic peptide synthesis.** Peptides were synthesized using standard Fmoc solid-phase  
515 peptide synthesis, utilizing the submonomer approach for peptoid synthesis (52), either at  
516 room temperature or with microwave assistance. Cyclization was done in solution at a  
517 high dilution. Fmoc-Xaa (10 mmol) was added to a flame-dried round-bottomed flask  
518 and dried in a vacuum desiccator with phosphorous pentoxide overnight. 50 ml of dry  
519 dichloromethane (DCM) was cannula transferred into the flask, followed by 2.5 ml of  
520 N,N-diisopropylethylamine (DIPEA) transferred via syringe. After sonication for 10 min,  
521 5g of 2-chlorotrityl resin was added under a stream of nitrogen and allowed to shake for 4

522 hrs. The resin was capped with a 15 ml solution of 1:2:17 methanol  
523 (MeOH):DIPEA:dimethylformamide (DMF) (3 times for 15 min each). The resin was  
524 washed with DMF (3 times with 15 ml each) followed by DCM (3 times with 15 ml  
525 each). The loading value was calculated by determining the mass increase of dried,  
526 loaded resin.

527

528 **Amino acid coupling at room temperature.** Four equivalents (eq) of Fmoc-Xaa, 8 eq of  
529 DIPEA, and 4 eq of 1-[Bis(dimethylamino)methylene]-1H-1,2,3-triazolo[4,5-  
530 b]pyridinium 3-oxide  
531 hexafluorophosphate, Hexafluorophosphate Azabenzotriazole Tetramethyl Uronium  
532 (HATU) were added to the resin in DMF. The reaction mixture was agitated via shaking  
533 for 45 min and then drained. The resin was washed with DMF (3 times with 3 ml each)  
534 and DCM (3 times with 3 ml each). The reaction was monitored by liquid  
535 chromatography-mass spectrometry (LC-MS) and repeated until the starting material was  
536 no longer observed. For microwave conditions, a solution of 4 eq of Fmoc-Xaa, 4 eq of  
537 HATU, and 6 eq of DIPEA in DMF was allowed to prereact for 5 min. This solution was  
538 added to the deprotected peptide on-resin and allowed to react for 10 min at 50°C under  
539 microwave heating. The solution was drained, and the resin was washed with DMF (3  
540 times with 3 ml each) and DCM (3 times with 3 ml each). The reaction was monitored by  
541 LC-MS and repeated until the starting material was no longer observed.

542

543 **Coupling of BrAcOH at room temperature.** A solution of 10 eq of bromoacetic acid  
544 (BrAcOH) and 5 eq of N,N'-diisopropylcarbodiimide (DIC) in DMF was allowed to



545 prereact for 10 min. This solution was added to the deprotected peptide on-resin. The  
546 reaction mixture was agitated via shaking for 45 min and then drained. The resin was  
547 washed with DMF (3 times with 3 ml each) and DCM (3 times with 3 ml each). The  
548 reaction was monitored by LC-MS and repeated until the starting material was no longer  
549 observed. The reaction was monitored by LC-MS and repeated until the starting material  
550 was no longer observed.

551

552 **Peptoid side chain addition.** A solution of 5 eq of the desired amine was prepared in a  
553 minimum volume of DMF. The resin containing the BrAc-peptide was swollen with  
554 DCM for 5 min prior to reaction. The amine was added, and the reaction mixture was  
555 agitated via shaking for 3 to 20 hrs. The solution was drained, and the resin was washed  
556 with DMF (3 times with 3 ml each) and DCM (3 times with 3 ml each). The reaction was  
557 monitored by LC-MS and repeated until the starting material was no longer observed.

558

559 **Removal of the N-Fmoc protection group at room temperature.** A solution of 2%  
560 piperidine and 2% 1,8-diazabicyclo[5.4.0]undec-7-ene (DBU) in DMF was added to the  
561 resin. The reaction mixture was agitated via shaking for 20 min and then drained. The  
562 resin was washed with DMF (3 times with 3 ml each) and DCM (3 times with 3 ml each).  
563 For microwave conditions, a solution of 2% piperidine and 2% DBU in DMF was added  
564 to the resin. The reaction mixture was allowed to react for 5 min at 50°C under  
565 microwave heating and then drained. The resin was washed with DMF (3 times with 3 ml  
566 each) and DCM (3 times with 3 ml each).

567

568 **Peptide cleavage.** Complete linear peptides were cleaved off the resin in 5 resin volumes  
569 of 2.5% trifluoroacetic acid (TFA) in DCM for 4 min, three times, with a 5-resin-volume  
570 DCM wash between steps. Solvent was removed under N<sub>2</sub>, followed by dissolution in  
571 acetone or DCM and evaporation under reduced pressure. Residual TFA was removed in  
572 vacuo overnight.

573

574 **Cyclization with COMU.** Linear peptides were dissolved in 20 ml of dry acetonitrile  
575 (ACN) with 4 eq of DIPEA and added dropwise (final concentration, 1 mg crude peptide  
576 per ml) to a solution of 1:1 tetrahydrofuran (THF)-ACN containing 2 eq of (1-cyano-2-  
577 ethoxy-2-oxoethylideneaminoxy) dimethylamino-morpholinocarbenium  
578 hexafluorophosphate (COMU). Reaction mixtures were stirred for 0.5 to 24 hrs, until  
579 complete cyclization was achieved as monitored by LC-MS. The reaction mixture was  
580 reduced in vacuo for purification via high pressure liquid chromatography (HPLC).

581

582 **Purification of peptides.** COMU by-products were removed after solution-phase  
583 cyclization on a Biotage Isolera Prime system equipped with a SNAP Ultra-C18 30g  
584 column eluting with H<sub>2</sub>O-acetonitrile modified with 0.1% TFA. The mass spectra of all  
585 peptides are shown in Fig. S7 in the supplemental material.

586

587 **Proton NMR of peptides.** Peptides were analyzed through nuclear magnetic resonance  
588 (NMR) spectroscopy measured in ppm and were obtained on a 500 MHz spectrometer  
589 using CDCl<sub>3</sub> ( $\delta=7.26$ ) as an internal standard for <sup>1</sup>H NMR. Identity of compounds for  
590 SAR study was confirmed by LCMS and <sup>1</sup>H-NMR (Fig. S7).

591

592 **Kinetic Solubility.** A 15 mM stock of the compounds in DMSO was prepared. 125 $\mu$ L of  
593 M9 and DMEM (no antibiotics) was dispensed into 96 v-bottom plate. One microliter of  
594 15mM stock compound was added to make a solution of 120 $\mu$ M final concentration with  
595 0.8% DMSO. The solution was shaken at 37°C for ~2 hrs. The solution was passed over a  
596 0.7  $\mu$ M glass fiber filter. Then the solution was diluted 1:4 in acetonitrile to crash out any  
597 proteins. The solution was centrifuged at 500 x g for 10 minutes. Avoiding the pellet, 10  
598  $\mu$ L of supernatant was added to a fresh plate with 90  $\mu$ L of acetonitrile. The final dilution  
599 is 40 times lower. 10 $\mu$ L of 40x dilution of solution was injected on the Orbi-trap. A 1 $\mu$ M  
600 standard was used for the ratiometric comparison and the assay was done in triplicate.

601

602 **Cyclic peptide manipulation.** Stock peptides were stored at 15 mM at -70°C and were  
603 prediluted in DMSO prior to experiments. All treatment and control pairs, in all assays,  
604 had the same DMSO volumes.

605

606 **Statistical analysis.** GraphPad Prism 8 (GraphPad Software, La Jolla, CA, USA) was  
607 used to calculate the mean, standard error of the mean, median, standard error of median,  
608 and one-way ANOVA values shown.

609

## 610 **ACKNOWLEDGEMENTS**

611 The authors acknowledge the National Institutes of Health grant R01AI141511 (to V.A.  
612 and R.S.L.) and K99AI139281 (to H.L.) for support. We thank Benjamin Abrams

613 (University of California, Santa Cruz) for technical support on the YscD spot tracking  
614 analysis. We thank Timothy Yahr for the anti-ExsE antibody.

615

616

## 617 REFERENCES

618

- 619 1. Santajit S, Indrawattana N. 2016. Mechanisms of Antimicrobial Resistance in  
620 ESKAPE Pathogens. *Biomed Res Int* 2016:2475067.
- 621 2. Ma YX, Wang CY, Li YY, Li J, Wan QQ, Chen JH, Tay FR, Niu LN. 2020.  
622 Considerations and Caveats in Combating ESKAPE Pathogens against  
623 Nosocomial Infections. *Adv Sci (Weinh)* 7:1901872.
- 624 3. Duncan MC, Linington RG, Auerbuch V. 2012. Chemical inhibitors of the type  
625 three secretion system: disarming bacterial pathogens. *Antimicrob Agents*  
626 *Chemother* 56:5433-41.
- 627 4. Calvert MB, Jumde VR, Titz A. 2018. Pathoblockers or antivirulence drugs as a  
628 new option for the treatment of bacterial infections. *Beilstein J Org Chem*  
629 14:2607-2617.
- 630 5. Relman DA, Lipsitch M. 2018. Microbiome as a tool and a target in the effort  
631 to address antimicrobial resistance. *Proc Natl Acad Sci U S A* 115:12902-  
632 12910.
- 633 6. Mohajeri MH, Brummer RJM, Rastall RA, Weersma RK, Harmsen HJM, Faas M,  
634 Eggersdorfer M. 2018. The role of the microbiome for human health: from  
635 basic science to clinical applications. *Eur J Nutr* 57:1-14.
- 636 7. Abby SS, Rocha EP. 2012. The non-flagellar type III secretion system evolved  
637 from the bacterial flagellum and diversified into host-cell adapted systems.  
638 *PLoS Genet* 8:e1002983.
- 639 8. Diepold A, Armitage JP. 2015. Type III secretion systems: the bacterial  
640 flagellum and the injectisome. *Philos Trans R Soc Lond B Biol Sci* 370.
- 641 9. Diepold A, Wagner S. 2014. Assembly of the bacterial type III secretion  
642 machinery. *FEMS Microbiol Rev* 38:802-22.
- 643 10. Fasciano AC, Shaban L, Meccas J. 2019. Promises and Challenges of the Type  
644 Three Secretion System Injectisome as an Antivirulence Target. *EcoSal Plus* 8.
- 645 11. Tabor DE, Oganessian V, Keller AE, Yu L, McLaughlin RE, Song E, Warrenner P,  
646 Rosenthal K, Esser M, Qi Y, Ruzin A, Stover CK, DiGiandomenico A. 2018.  
647 *Pseudomonas aeruginosa* PcrV and Psl, the Molecular Targets of Bispecific  
648 Antibody MEDI3902, Are Conserved Among Diverse Global Clinical Isolates. *J*  
649 *Infect Dis* 218:1983-1994.
- 650 12. DiGiandomenico A, Keller AE, Gao C, Rainey GJ, Warrenner P, Camara MM,  
651 Bonnell J, Fleming R, Bezabeh B, Dimasi N, Sellman BR, Hilliard J, Guenther

- 652 CM, Datta V, Zhao W, Gao C, Yu XQ, Suzich JA, Stover CK. 2014. A  
653 multifunctional bispecific antibody protects against *Pseudomonas*  
654 *aeruginosa*. *Sci Transl Med* 6:262ra155.
- 655 13. Ha\*\*cker G. 2018. *Biology of chlamydia*. Springer, Cham, Switzerland.
- 656 14. Lam H, Schwochert J, Lao Y, Lau T, Lloyd C, Luu J, Kooner O, Morgan J, Lokey  
657 S, Auerbuch V. 2017. Synthetic cyclic peptomers as type III secretion system  
658 inhibitors. *Antimicrob Agents Chemother* doi:10.1128/AAC.00060-17.
- 659 15. Gophna U, Ron EZ, Graur D. 2003. Bacterial type III secretion systems are  
660 ancient and evolved by multiple horizontal-transfer events. *Gene* 312:151-  
661 63.
- 662 16. Bent ZW, Branda SS, Young GM. 2013. The *Yersinia enterocolitica* Ysa type III  
663 secretion system is expressed during infections both in vitro and in vivo.  
664 *Microbiologyopen* 2:962-75.
- 665 17. Venecia K, Young GM. 2005. Environmental regulation and virulence  
666 attributes of the Ysa type III secretion system of *Yersinia enterocolitica*  
667 biovar 1B. *Infect Immun* 73:5961-77.
- 668 18. Young BM, Young GM. 2002. Evidence for targeting of Yop effectors by the  
669 chromosomally encoded Ysa type III secretion system of *Yersinia*  
670 *enterocolitica*. *J Bacteriol* 184:5563-71.
- 671 19. Hallstrom KN, McCormick BA. 2016. The type three secreted effector SipC  
672 regulates the trafficking of PERP during *Salmonella* infection. *Gut Microbes*  
673 7:136-45.
- 674 20. Singh PK, Kapoor A, Lomash RM, Kumar K, Kamerkar SC, Pucadyil TJ,  
675 Mukhopadhyay A. 2018. *Salmonella* SipA mimics a cognate SNARE for host  
676 Syntaxin8 to promote fusion with early endosomes. *J Cell Biol* 217:4199-  
677 4214.
- 678 21. Lilic M, Galkin VE, Orlova A, VanLoock MS, Egelman EH, Stebbins CE. 2003.  
679 *Salmonella* SipA polymerizes actin by stapling filaments with nonglobular  
680 protein arms. *Science* 301:1918-21.
- 681 22. Deng W, Marshall NC, Rowland JL, McCoy JM, Worrall LJ, Santos AS,  
682 Strynadka NCJ, Finlay BB. 2017. Assembly, structure, function and regulation  
683 of type III secretion systems. *Nat Rev Microbiol* 15:323-337.
- 684 23. Diepold A, Amstutz M, Abel S, Sorg I, Jenal U, Cornelis GR. 2010. Deciphering  
685 the assembly of the *Yersinia* type III secretion injectisome. *EMBO J* 29:1928-  
686 40.
- 687 24. Diepold A. 2019. Assembly and Post-assembly Turnover and Dynamics in the  
688 Type III Secretion System. *Curr Top Microbiol Immunol*  
689 doi:10.1007/82\_2019\_164.
- 690 25. Diepold A, Sezgin E, Huseyin M, Mortimer T, Eggeling C, Armitage JP. 2017. A  
691 dynamic and adaptive network of cytosolic interactions governs protein  
692 export by the T3SS injectisome. *Nat Commun* 8:15940.
- 693 26. Kudryashev M, Stenta M, Schmelz S, Amstutz M, Wiesand U, Castano-Diez D,  
694 Degiacomi MT, Munnich S, Bleck CK, Kowal J, Diepold A, Heinz DW, Dal  
695 Peraro M, Cornelis GR, Stahlberg H. 2013. In situ structural analysis of the  
696 *Yersinia enterocolitica* injectisome. *Elife* 2:e00792.

- 697 27. Ha UH, Wang Y, Jin S. 2003. DsbA of *Pseudomonas aeruginosa* is essential for  
698 multiple virulence factors. *Infect Immun* 71:1590-5.
- 699 28. Bowlin NO, Williams JD, Knoten CA, Torhan MC, Tashjian TF, Li B, Aiello D,  
700 Meccas J, Hauser AR, Peet NP, Bowlin TL, Moir DT. 2014. Mutations in the  
701 *Pseudomonas aeruginosa* needle protein gene *pscF* confer resistance to  
702 phenoxyacetamide inhibitors of the type III secretion system. *Antimicrob*  
703 *Agents Chemother* 58:2211-20.
- 704 29. Rietsch A, Vallet-Gely I, Dove SL, Mekalanos JJ. 2005. ExsE, a secreted  
705 regulator of type III secretion genes in *Pseudomonas aeruginosa*. *Proc Natl*  
706 *Acad Sci U S A* 102:8006-11.
- 707 30. Green ER, Meccas J. 2016. Bacterial Secretion Systems: An Overview.  
708 *Microbiol Spectr* 4.
- 709 31. Avican U, Doruk T, Ostberg Y, Fahlgren A, Forsberg A. 2017. The Tat  
710 Substrate SufI Is Critical for the Ability of *Yersinia pseudotuberculosis* To  
711 Cause Systemic Infection. *Infect Immun* 85.
- 712 32. Bageshwar UK, VerPlank L, Baker D, Dong W, Hamsanathan S, Whitaker N,  
713 Sacchettini JC, Musser SM. 2016. High Throughput Screen for *Escherichia coli*  
714 Twin Arginine Translocation (Tat) Inhibitors. *PLoS One* 11:e0149659.
- 715 33. Muschiol S, Bailey L, Gylfe A, Sundin C, Hultenby K, Bergstrom S, Elofsson M,  
716 Wolf-Watz H, Normark S, Henriques-Normark B. 2006. A small-molecule  
717 inhibitor of type III secretion inhibits different stages of the infectious cycle  
718 of *Chlamydia trachomatis*. *Proc Natl Acad Sci U S A* 103:14566-71.
- 719 34. Lee PC, Rietsch A. 2015. Fueling type III secretion. *Trends Microbiol* 23:296-  
720 300.
- 721 35. Paul K, Erhardt M, Hirano T, Blair DF, Hughes KT. 2008. Energy source of  
722 flagellar type III secretion. *Nature* 451:489-92.
- 723 36. Lee PA, Tullman-Ercek D, Georgiou G. 2006. The bacterial twin-arginine  
724 translocation pathway. *Annu Rev Microbiol* 60:373-95.
- 725 37. Troisfontaines P, Cornelis GR. 2005. Type III secretion: More systems than  
726 you think. *Physiology* 20:326-339.
- 727 38. Auvray F, Ozin AJ, Claret L, Hughes C. 2002. Intrinsic membrane targeting of  
728 the flagellar export ATPase FliI: interaction with acidic phospholipids and  
729 FliH. *J Mol Biol* 318:941-50.
- 730 39. Wagner S, Grin I, Malmsheimer S, Singh N, Torres-Vargas CE, Westerhausen  
731 S. 2018. Bacterial type III secretion systems: a complex device for the  
732 delivery of bacterial effector proteins into eukaryotic host cells. *FEMS*  
733 *Microbiol Lett* 365.
- 734 40. McCaw ML, Lykken GL, Singh PK, Yahr TL. 2002. ExsD is a negative regulator  
735 of the *Pseudomonas aeruginosa* type III secretion regulon. *Molecular*  
736 *Microbiology* 46:1123-1133.
- 737 41. Urbanowski ML, Lykken GL, Yahr TL. 2005. A secreted regulatory protein  
738 couples transcription to the secretory activity of the *Pseudomonas*  
739 *aeruginosa* type III secretion system. *Proceedings of the National Academy of*  
740 *Sciences of the United States of America* 102:9930-9935.
- 741 42. Elwell C, Mirrashidi K, Engel J. 2016. *Chlamydia* cell biology and  
742 pathogenesis. *Nat Rev Microbiol* 14:385-400.



- 743 43. Al-Zeer MA, Al-Younes HM, Kerr M, Abu-Lubad M, Gonzalez E, Brinkmann V,  
744 Meyer TF. 2014. Chlamydia trachomatis remodels stable microtubules to  
745 coordinate Golgi stack recruitment to the chlamydial inclusion surface. *Mol*  
746 *Microbiol* 94:1285-97.
- 747 44. Derre I. 2015. Chlamydiae interaction with the endoplasmic reticulum:  
748 contact, function and consequences. *Cell Microbiol* 17:959-66.
- 749 45. Kumar Y, Valdivia RH. 2008. Actin and intermediate filaments stabilize the  
750 Chlamydia trachomatis vacuole by forming dynamic structural scaffolds. *Cell*  
751 *Host Microbe* 4:159-69.
- 752 46. Klockner A, Buhl H, Viollier P, Henrichfreise B. 2018. Deconstructing the  
753 Chlamydial Cell Wall. *Curr Top Microbiol Immunol* 412:1-33.
- 754 47. Miller KE. 2006. Diagnosis and treatment of Chlamydia trachomatis infection.  
755 *Am Fam Physician* 73:1411-6.
- 756 48. Phillips S, Quigley BL, Timms P. 2019. Seventy Years of Chlamydia Vaccine  
757 Research - Limitations of the Past and Directions for the Future. *Front*  
758 *Microbiol* 10:70.
- 759 49. Krupp K, Madhivanan P. 2015. Antibiotic resistance in prevalent bacterial  
760 and protozoan sexually transmitted infections. *Indian J Sex Transm Dis AIDS*  
761 36:3-8.
- 762 50. Young BM, Young GM. 2002. YplA is exported by the Ysc, Ysa, and flagellar  
763 type III secretion systems of *Yersinia enterocolitica*. *J Bacteriol* 184:1324-34.
- 764 51. Woehrmann MH, Bray WM, Durbin JK, Nisam SC, Michael AK, Glassey E,  
765 Stuart JM, Lokey RS. 2013. Large-scale cytological profiling for functional  
766 analysis of bioactive compounds. *Mol Biosyst* 9:2604-17.
- 767 52. Ronald N. Zuckermann JMK, Stephen B. H. Kent and Walter H. Moos. 1992.  
768 Efficient method for the preparation of peptoids [oligo(N-substituted  
769 glycines)] by submonomer solid-phase synthesis. *Journal of the American*  
770 *Chemical Society* 114:2.
- 771 53. Aiello D, Williams JD, Majgier-Baranowska H, Patel I, Peet NP, Huang J, Lory S,  
772 Bowlin TL, Moir DT. 2010. Discovery and characterization of inhibitors of  
773 *Pseudomonas aeruginosa* type III secretion. *Antimicrob Agents Chemother*  
774 54:1988-99.
- 775 54. Kim OK, Garrity-Ryan LK, Bartlett VJ, Grier MC, Verma AK, Medjanis G,  
776 Donatelli JE, Macone AB, Tanaka SK, Levy SB, Alekshun MN. 2009. N-  
777 Hydroxybenzimidazole Inhibitors of the Transcription Factor LcrF in  
778 *Yersinia*: Novel Antivirulence Agents. *Journal of Medicinal Chemistry*  
779 52:5626-5634.
- 780 55. Enquist PA, Gylfe A, Hagglund U, Lindstrom P, Norberg-Scherman H, Sundin  
781 C, Elofsson M. 2012. Derivatives of 8-hydroxyquinoline--antibacterial agents  
782 that target intra- and extracellular Gram-negative pathogens. *Bioorg Med*  
783 *Chem Lett* 22:3550-3.
- 784 56. Anantharajah A, Buyck JM, Sundin C, Tulkens PM, Mingeot-Leclercq MP, Van  
785 Bambeke F. 2017. Salicylidene Acylhydrazides and Hydroxyquinolines Act as  
786 Inhibitors of Type Three Secretion Systems in *Pseudomonas aeruginosa* by  
787 Distinct Mechanisms. *Antimicrob Agents Chemother* 61.

- 788 57. Anantharajah A, Faure E, Buyck JM, Sundin C, Lindmark T, Mecsas J, Yahr TL,  
789 Tulkens PM, Mingeot-Leclercq MP, Guery B, Van Bambeke F. 2016. Inhibition  
790 of the Injectisome and Flagellar Type III Secretion Systems by INP1855  
791 Impairs *Pseudomonas aeruginosa* Pathogenicity and Inflammasome  
792 Activation. *J Infect Dis* 214:1105-16.
- 793 58. Slepentin A, Enquist PA, Hagglund U, de la Maza LM, Elofsson M, Peterson  
794 EM. 2007. Reversal of the antichlamydial activity of putative type III  
795 secretion inhibitors by iron. *Infect Immun* 75:3478-89.
- 796 59. Layton AN, Hudson DL, Thompson A, Hinton JC, Stevens JM, Galyov EE,  
797 Stevens MP. 2010. Salicylidene acylhydrazide-mediated inhibition of type III  
798 secretion system-1 in *Salmonella enterica* serovar Typhimurium is  
799 associated with iron restriction and can be reversed by free iron. *FEMS*  
800 *Microbiol Lett* 302:114-22.
- 801 60. Hudson DL, Layton AN, Field TR, Bowen AJ, Wolf-Watz H, Elofsson M, Stevens  
802 MP, Galyov EE. 2007. Inhibition of type III secretion in *Salmonella enterica*  
803 serovar Typhimurium by small-molecule inhibitors. *Antimicrob Agents*  
804 *Chemother* 51:2631-5.
- 805 61. Morgan JM, Lam HN, Delgado J, Luu J, Mohammadi S, Isberg RR, Wang H,  
806 Auerbuch V. 2018. An Experimental Pipeline for Initial Characterization of  
807 Bacterial Type III Secretion System Inhibitor Mode of Action Using  
808 Enteropathogenic *Yersinia*. *Front Cell Infect Microbiol* 8:404.
- 809 62. Kauppi AM, Nordfelth R, Uvell H, Wolf-Watz H, Elofsson M. 2003. Targeting  
810 bacterial virulence: inhibitors of type III secretion in *Yersinia*. *Chem Biol*  
811 *10*:241-9.
- 812 63. Wang D, Zetterstrom CE, Gabrielsen M, Beckham KS, Tree JJ, Macdonald SE,  
813 Byron O, Mitchell TJ, Gally DL, Herzyk P, Mahajan A, Uvell H, Burchmore R,  
814 Smith BO, Elofsson M, Roe AJ. 2011. Identification of bacterial target proteins  
815 for the salicylidene acylhydrazide class of virulence-blocking compounds. *J*  
816 *Biol Chem* 286:29922-31.
- 817 64. Nordfelth R, Kauppi AM, Norberg HA, Wolf-Watz H, Elofsson M. 2005. Small-  
818 molecule inhibitors specifically targeting type III secretion. *Infect Immun*  
819 *73*:3104-14.
- 820 65. Tree JJ, Wang D, McNally C, Mahajan A, Layton A, Houghton I, Elofsson M,  
821 Stevens MP, Gally DL, Roe AJ. 2009. Characterization of the effects of  
822 salicylidene acylhydrazide compounds on type III secretion in *Escherichia*  
823 *coli* O157:H7. *Infect Immun* 77:4209-20.
- 824 66. Zambelloni R, Connolly JPR, Huerta Uribe A, Burgess K, Marquez R, Roe AJ.  
825 2017. Novel compounds targeting the enterohemorrhagic *Escherichia coli*  
826 type three secretion system reveal insights into mechanisms of secretion  
827 inhibition. *Mol Microbiol* 105:606-619.
- 828 67. Yang F, Korban SS, Pusey PL, Elofsson M, Sundin GW, Zhao Y. 2014. Small-  
829 molecule inhibitors suppress the expression of both type III secretion and  
830 amylovoran biosynthesis genes in *Erwinia amylovora*. *Mol Plant Pathol*  
831 *15*:44-57.



- 832 68. Harmon DE, Davis AJ, Castillo C, Mecsas J. 2010. Identification and  
833 characterization of small-molecule inhibitors of Yop translocation in *Yersinia*  
834 *pseudotuberculosis*. *Antimicrob Agents Chemother* 54:3241-54.
- 835 69. Jessen DL, Bradley DS, Nilles ML. 2014. A type III secretion system inhibitor  
836 targets YopD while revealing differential regulation of secretion in calcium-  
837 blind mutants of *Yersinia pestis*. *Antimicrob Agents Chemother* 58:839-50.
- 838 70. Gauthier A, Robertson ML, Lowden M, Ibarra JA, Puente JL, Finlay BB. 2005.  
839 Transcriptional inhibitor of virulence factors in enteropathogenic  
840 *Escherichia coli*. *Antimicrob Agents Chemother* 49:4101-9.
- 841 71. Duncan MC, Wong WR, Dupzyk AJ, Bray WM, Linington RG, Auerbuch V.  
842 2014. An NF-kappaB-based high-throughput screen identifies piericidins as  
843 inhibitors of the *Yersinia pseudotuberculosis* type III secretion system.  
844 *Antimicrob Agents Chemother* 58:1118-26.
- 845 72. Grishin AV, Luyksaar SI, Kapotina LN, Kirsanov DD, Zayakin ES, Karyagina AS,  
846 Zigangirova NA. 2018. Identification of chlamydial T3SS inhibitors through  
847 virtual screening against T3SS ATPase. *Chem Biol Drug Des* 91:717-727.
- 848 73. Hao H, Aixia Y, Lei F, Nancai Y, Wen S. 2010. Effects of baicalin on *Chlamydia*  
849 *trachomatis* infection in vitro. *Planta Med* 76:76-8.
- 850 74. Tsou LK, Lara-Tejero M, RoseFigura J, Zhang ZJ, Wang YC, Yount JS, Lefebvre  
851 M, Dossa PD, Kato J, Guan F, Lam W, Cheng YC, Galan JE, Hang HC. 2016.  
852 Antibacterial Flavonoids from Medicinal Plants Covalently Inactivate Type III  
853 Protein Secretion Substrates. *J Am Chem Soc* 138:2209-18.
- 854 75. Guo Z, Li X, Li J, Yang X, Zhou Y, Lu C, Shen Y. 2016. Licoflavonol is an  
855 inhibitor of the type three secretion system of *Salmonella enterica* serovar  
856 *Typhimurium*. *Biochem Biophys Res Commun* 477:998-1004.
- 857 76. Nakasone N, Higa N, Toma C, Ogura Y, Suzuki T, Yamashiro T. 2017.  
858 Epigallocatechin gallate inhibits the type III secretion system of Gram-  
859 negative enteropathogenic bacteria under model conditions. *FEMS Microbiol*  
860 *Lett* 364.
- 861 77. Zhang Y, Liu Y, Wang T, Deng X, Chu X. 2018. Natural compound sanguinarine  
862 chloride targets the type III secretion system of *Salmonella enterica* Serovar  
863 *Typhimurium*. *Biochem Biophys Rep* 14:149-154.
- 864 78. Choi WS, Lee TH, Son SJ, Kim TG, Kwon BM, Son HU, Kim SU, Lee SH. 2017.  
865 Inhibitory effect of obovatol from *Magnolia obovata* on the *Salmonella* type  
866 III secretion system. *J Antibiot (Tokyo)* 70:1065-1069.
- 867 79. Zhang Y, Liu Y, Qiu J, Luo ZQ, Deng X. 2018. The Herbal Compound Thymol  
868 Protects Mice From Lethal Infection by *Salmonella Typhimurium*. *Front*  
869 *Microbiol* 9:1022.
- 870 80. Felise HB, Nguyen HV, Pfuetzner RA, Barry KC, Jackson SR, Blanc MP,  
871 Bronstein PA, Kline T, Miller SI. 2008. An inhibitor of gram-negative bacterial  
872 virulence protein secretion. *Cell Host Microbe* 4:325-36.
- 873 81. Bzdzion L, Krezel H, Wrzeszcz K, Grzegorek I, Nowinska K, Chodaczek G,  
874 Swietnicki W. 2017. Design of small molecule inhibitors of type III secretion  
875 system ATPase EscN from enteropathogenic *Escherichia coli*. *Acta Biochim*  
876 *Pol* 64:49-63.

- 877 82. Nesterenko LN, Zigangirova NA, Zayakin ES, Luyksaar SI, Kobets NV, Balunets  
878 DV, Shabalina LA, Bolshakova TN, Dobrynina OY, Gintsburg AL. 2016. A  
879 small-molecule compound belonging to a class of 2,4-disubstituted 1,3,4-  
880 thiadiazine-5-ones suppresses *Salmonella* infection in vivo. *J Antibiot*  
881 (Tokyo) 69:422-7.
- 882 83. Zigangirova NA, Kost EA, Didenko LV, Kapotina LN, Zayakin ES, Luyksaar SI,  
883 Morgunova EY, Fedina ED, Artyukhova OA, Samorodov AV, Kobets NV. 2016.  
884 A small-molecule compound belonging to a class of 2,4-disubstituted 1,3,4-  
885 thiadiazine-5-ones inhibits intracellular growth and persistence of  
886 *Chlamydia trachomatis*. *J Med Microbiol* 65:91-98.
- 887 84. Sheremet AB, Zigangirova NA, Zayakin ES, Luyksaar SI, Kapotina LN,  
888 Nesterenko LN, Kobets NV, Gintsburg AL. 2018. Small Molecule Inhibitor of  
889 Type Three Secretion System Belonging to a Class 2,4-disubstituted-4H-  
890 [1,3,4]-thiadiazine-5-ones Improves Survival and Decreases Bacterial Loads  
891 in an Airway *Pseudomonas aeruginosa* Infection in Mice. *Biomed Res Int*  
892 2018:5810767.
- 893 85. Zetterstrom CE, Hasselgren J, Salin O, Davis RA, Quinn RJ, Sundin C, Elofsson  
894 M. 2013. The resveratrol tetramer (-)-hopeaphenol inhibits type III secretion  
895 in the gram-negative pathogens *Yersinia pseudotuberculosis* and  
896 *Pseudomonas aeruginosa*. *PLoS One* 8:e81969.
- 897 86. Kang JE, Jeon BJ, Park MY, Yang HJ, Kwon J, Lee DH, Kim BS. 2020. Inhibition  
898 of the type III secretion system of *Pseudomonas syringae* pv. tomato DC3000  
899 by resveratrol oligomers identified in *Vitis vinifera* L. *Pest Manag Sci*  
900 76:2294-2303.
- 901 87. Lv Q, Li S, Wei H, Wen Z, Wang Y, Tang T, Wang J, Xia L, Deng X. 2020.  
902 Identification of the natural product paeonol derived from peony bark as an  
903 inhibitor of the *Salmonella enterica* serovar Typhimurium type III secretion  
904 system. *Appl Microbiol Biotechnol* 104:1673-1682.
- 905 88. Lv Q, Chu X, Yao X, Ma K, Zhang Y, Deng X. 2019. Inhibition of the type III  
906 secretion system by syringaldehyde protects mice from *Salmonella enterica*  
907 serovar Typhimurium. *J Cell Mol Med* 23:4679-4688.
- 908 89. Li J, Sun W, Guo Z, Lu C, Shen Y. 2014. Fusaric acid modulates Type Three  
909 Secretion System of *Salmonella enterica* serovar Typhimurium. *Biochem*  
910 *Biophys Res Commun* 449:455-9.
- 911 90. Li J, Lv C, Sun W, Li Z, Han X, Li Y, Shen Y. 2013. Cytosporone B, an inhibitor of  
912 the type III secretion system of *Salmonella enterica* serovar Typhimurium.  
913 *Antimicrob Agents Chemother* 57:2191-8.
- 914 91. Kimura K, Iwatsuki M, Nagai T, Matsumoto A, Takahashi Y, Shiomi K, Omura  
915 S, Abe A. 2011. A small-molecule inhibitor of the bacterial type III secretion  
916 system protects against in vivo infection with *Citrobacter rodentium*. *J*  
917 *Antibiot (Tokyo)* 64:197-203.
- 918 92. Ma YN, Chen L, Si NG, Jiang WJ, Zhou ZG, Liu JL, Zhang LQ. 2019. Identification  
919 of Benzyloxy Carbonimidoyl Dicyanide Derivatives as Novel Type III  
920 Secretion System Inhibitors via High-Throughput Screening. *Front Plant Sci*  
921 10:1059.

- 922 93. Wagener BM, Anjum N, Evans C, Brandon A, Honavar J, Creighton J, Traber  
923 MG, Stuart RL, Stevens T, Pittet JF. 2020. Alpha-tocopherol Attenuates the  
924 Severity of *Pseudomonas aeruginosa*-induced Pneumonia. *Am J Respir Cell*  
925 *Mol Biol* doi:10.1165/rcmb.2019-01850C.
- 926 94. Liu Y, Zhang Y, Zhou Y, Wang T, Deng X, Chu X, Zhou T. 2019.  
927 Cinnamaldehyde inhibits type three secretion system in *Salmonella enterica*  
928 serovar Typhimurium by affecting the expression of key effector proteins.  
929 *Vet Microbiol* 239:108463.
- 930 95. Bliska JB, Guan KL, Dixon JE, Falkow S. 1991. Tyrosine Phosphate Hydrolysis  
931 of Host Proteins by an Essential *Yersinia*-Virulence Determinant. *Proceedings*  
932 *of the National Academy of Sciences of the United States of America* 88:1187-  
933 1191.
- 934 96. Rabin SD, Hauser AR. 2005. Functional regions of the *Pseudomonas*  
935 *aeruginosa* cytotoxin ExoU. *Infect Immun* 73:573-82.
- 936 97. Rangel SM, Diaz MH, Knoten CA, Zhang A, Hauser AR. 2015. The Role of ExoS  
937 in Dissemination of *Pseudomonas aeruginosa* during Pneumonia. *PLoS*  
938 *Pathog* 11:e1004945.
- 939 98. Portnoy DA, Moseley SL, Falkow S. 1981. Characterization of plasmids and  
940 plasmid-associated determinants of *Yersinia enterocolitica* pathogenesis.  
941 *Infect Immun* 31:775-82.
- 942 99. Winter SE, Winter MG, Poon V, Keestra AM, Sterzenbach T, Faber F, Costa LF,  
943 Cassou F, Costa EA, Alves GE, Paixao TA, Santos RL, Baumler AJ. 2014.  
944 *Salmonella enterica* Serovar Typhi conceals the invasion-associated type  
945 three secretion system from the innate immune system by gene regulation.  
946 *PLoS Pathog* 10:e1004207.
- 947 100. Matsui H, Eguchi M, Ohsumi K, Nakamura A, Isshiki Y, Sekiya K, Kikuchi Y,  
948 Nagamitsu T, Masuma R, Sunazuka T, Omura S. 2005. Azithromycin inhibits  
949 the formation of flagellar filaments without suppressing flagellin synthesis in  
950 *Salmonella enterica* serovar typhimurium. *Antimicrob Agents Chemother*  
951 49:3396-403.
- 952
- 953

954 **Table 1: Compounds synthesized and used in this study**

955

| <b>Simplified Name</b> | <b>Full Name/<br/>side chain identity (1-6)</b>                                                        | <b>Exact Mass</b> | <b>Reference</b> |
|------------------------|--------------------------------------------------------------------------------------------------------|-------------------|------------------|
| 1EpDN                  | EpD-1,2N / Propylamine, Benzylamine, D-Leu, L-Ile, L-Leu, and D-Phe (PBDLLD)                           | 732.46            | (14)             |
| 1EpDN 1Sar             | EpD1,2N 1Sar / Sarcosine, Benzylamine, D-Leu, L-Ile, L-Leu, and D-Phe (SarBDLLD)                       | 704.43            | This study       |
| 1EpDN 2Sar             | EpD1,2N 2Sar / Propylamine, Sarcosine, D-Leu, L-Ile, L-Leu, and D-Phe (PSarDLLD)                       | 656.43            | This study       |
| 1EpDN 3Ala             | EpD-1,2N 3Ala / Propylamine, Benzylamine, D-Ala, L-Ile, L-Leu, and D-Phe (PB,D-Ala,LLD)                | 690.41            | This study       |
| 1EpDN 4Ala             | EpD-1,2N 4Ala / Propylamine, Benzylamine, D-Leu, L-Ala, L-Leu, and D-Phe (PBD,L-Ala,LD)                | 690.41            | This study       |
| 1EpDN 5Ala             | EpD-1,2N 5Ala / Propylamine, Benzylamine, D-Leu, L-Ile, L-Ala, and D-Phe (PBDL,L-Ala,D)                | 690.41            | This study       |
| 1EpDN 6Ala             | EpD-1,2N 6Ala / Propylamine, Benzylamine, D-Leu, L-Ile, L-Leu, and D-Ala (PBDL,L,D-Ala)                | 656.43            | This study       |
| 2EpDN                  | 2-EpD1,2N / Propylamine, Benzylamine, L-Leu, L-Ile, L-Leu, and D-Phe (PBLLLD)                          | 732.46            | This study       |
| 3EpDN                  | 3-EpD1,2N / Propylamine, Benzylamine, D-Leu, L-Ile, D-Leu, and D-Phe (PBDLDD)                          | 732.46            | This study       |
| 4EpDN                  | 4-EpD1,2N / Propylamine, Benzylamine, L-Leu, L-Ile, D-Leu, and D-Phe (PBLDD)                           | 732.46            | This study       |
| 5EpDN                  | 5-EpD1,2N / Propylamine, Benzylamine, L-Leu, L-Ile, D-Leu, and L-Phe (PBLDDL)                          | 732.46            | This study       |
| 6EpDN                  | 6-EpD1,2N / Propylamine, Benzylamine, D-Leu, L-Ile, D-Leu, and L-Phe (PBDLDDL)                         | 732.46            | This study       |
| 7EpDN                  | 7-EpD1,2N / Propylamine, Benzylamine, L-Leu, L-Ile, L-Leu, and L-Phe (PBLLLL)                          | 732.46            | This study       |
| 8EpDN                  | 8-EpD1,2N / Propylamine, Benzylamine, D-Leu, L-Ile, L-Leu, and L-Phe (PBDLLL)                          | 732.46            | This study       |
| 9EpDN                  | 9-EpD1,2N / Propylamine, Benzylamine, L-Leu, D-Ile, D-Leu, and L-Phe (PBLDDL)<br>(Enantiomer of 1EpDN) | 732.46            | This study       |
| 4EpDN 1Sar             | 4-EpD1,2N 1Sar / Sarcosine, Benzylamine, L-Leu, L-Ile, D-Leu, and D-Phe (SarBLLDD)                     | 704.43            | This study       |
| 4EpDN 2Sar             | 4-EpD1,2N 2Sar / Propylamine, Sarcosine, L-Leu, L-Ile, D-Leu, and D-Phe (PSarLLDD)                     | 656.43            | This study       |

956

957

958

959 **Table 2: Efficacy of cyclic peptomers and other type III secretion system inhibitors.**

960

| Species/T3SS family <sup>a</sup> | PA                         | Ysc                                                  | Ysa                       | SPI-1                      | EPEC /EHEC                    | <i>Chlamydia</i>         | PS                      | fliC            | Ref.       |
|----------------------------------|----------------------------|------------------------------------------------------|---------------------------|----------------------------|-------------------------------|--------------------------|-------------------------|-----------------|------------|
|                                  | Psc/Ysc                    |                                                      | Inv-Mxi-Spa               |                            | Ssa-Esc                       | Chlamydiales             | Hrc1                    | fla             |            |
| 4EpDN                            | 3.9<br>ExoU <sup>b</sup>   | ~7.5<br>YopE <sup>b</sup>                            | 16.1<br>YspF <sup>b</sup> | 1<br>SipAC <sup>b</sup>    |                               | ~9 <sup>c</sup>          |                         | NE <sup>d</sup> | This study |
| 4EpDN 2Sar                       | 139.5<br>ExoU <sup>b</sup> |                                                      |                           | ~30<br>SipAC <sup>b</sup>  |                               | X                        |                         | NE <sup>d</sup> | This study |
| 1EpDN                            | 8.2<br>ExoU <sup>b</sup>   | 14.3<br>YopE <sup>b</sup>                            |                           |                            |                               |                          |                         |                 | (14)       |
| MBX1641 Phe <sup>*</sup>         | 10 ExoS <sup>b</sup>       |                                                      |                           |                            |                               | ~10 <sup>c</sup>         |                         |                 | (53)       |
| MBX2359 Phe                      | 2.5 ExoS <sup>b</sup>      |                                                      |                           |                            |                               |                          |                         |                 | (28)       |
| MBX2401 Phe                      | 1.2 ExoS <sup>b</sup>      |                                                      |                           |                            |                               |                          |                         |                 | (54)       |
| Hydroxybenzimidazoles            | ~3.5<br>ExsA <sup>e</sup>  | ~3.9<br>LcrF <sup>c</sup>                            |                           |                            |                               |                          |                         |                 | (54)       |
| INP1750 HQ <sup>*</sup>          | ~80 <sup>c</sup>           | 12.4<br>YopEe<br>EC <sub>50</sub>                    |                           |                            |                               | 25<br>MIC <sup>c</sup>   |                         | ~80             | (55, 56)   |
| INP1767 HQ                       |                            | 14.6<br>YopE <sup>c</sup><br>EC <sub>50</sub>        |                           |                            |                               | 12.5<br>MIC <sup>c</sup> |                         |                 | (55)       |
| INP1855 HQ                       | ~60 <sup>c</sup>           | 6.3<br>YopE <sup>c</sup><br>EC <sub>50</sub>         |                           |                            |                               | 3.13<br>MIC <sup>c</sup> |                         | ~30             | (55, 57)   |
| INP0341 SAH <sup>*</sup>         | ~80 <sup>c</sup>           |                                                      |                           |                            |                               | ~20 <sup>c</sup>         |                         |                 | (56, 58)   |
| INP0400 SAH                      |                            |                                                      |                           |                            |                               | ~20 <sup>c</sup>         |                         |                 | (58)       |
| INP0403 SAH                      |                            |                                                      |                           | ~100<br>SipAC <sup>b</sup> |                               |                          |                         |                 | (59, 60)   |
| INP0007 SAH                      |                            | ~50<br>YopE <sup>b</sup>                             |                           | ~100<br>SipAC <sup>b</sup> |                               |                          |                         |                 | (60, 61)   |
| C2, C4 SAH                       |                            | ~20; ~5<br>Yops <sup>b</sup>                         |                           |                            |                               |                          |                         |                 | (62)       |
| ME0052 SAH                       |                            | ~20<br>Yops <sup>b</sup>                             |                           |                            |                               |                          |                         |                 | (63)       |
| INP0010 SAH<br>C1 SAH            |                            | ~50<br>YopE <sup>b</sup><br>~50<br>Yops <sup>b</sup> |                           |                            |                               |                          |                         |                 | (64)       |
| ME0055 SAH<br>(INP0031)          |                            |                                                      |                           |                            | ~20 LEE<br>genes <sup>e</sup> |                          |                         |                 | (65)       |
| RCZ12 SAH<br>RCZ20 SAH           |                            |                                                      |                           |                            | ~25<br>EspD <sup>b</sup>      |                          |                         |                 | (66)       |
| INP0401 SAH<br>5277768 SAH       |                            |                                                      |                           |                            |                               |                          | ~50<br>hrp <sup>e</sup> |                 | (67)       |
| Compound 3                       | 13<br>ExoS <sup>b</sup>    | 6<br>YopE <sup>b</sup>                               |                           |                            |                               |                          |                         |                 | (53)       |
| C20                              | ~60 <sup>c</sup>           | ~60<br>YopE <sup>f</sup>                             |                           |                            |                               |                          |                         |                 | (68)       |
| Compound D                       | ~60<br>ExoU <sup>c</sup>   | ~60<br>YopE <sup>b</sup>                             |                           |                            |                               |                          |                         |                 | (69)       |
| Salicylideneanilide              |                            |                                                      |                           |                            | 15<br>EspB <sup>b</sup>       |                          |                         |                 | (70)       |

|                                     |                                              |                              |                        |                                      |                                |                        |                 |          |
|-------------------------------------|----------------------------------------------|------------------------------|------------------------|--------------------------------------|--------------------------------|------------------------|-----------------|----------|
| <b>Piercidin A1, Mer-A 2026B</b>    |                                              | ~36; ~9 YopM <sup>f</sup>    |                        |                                      |                                |                        |                 | (71)     |
| <b>N-arylbenzylamines</b>           |                                              |                              |                        |                                      |                                | ~50 IncA <sup>f</sup>  |                 | (72)     |
| <b>Baicalein Flavonoid</b>          |                                              |                              |                        | 3.6 SopE2 <sup>b</sup>               |                                | 0.5mM <sup>c</sup>     |                 | (73, 74) |
| <b>Licoflavonol</b>                 |                                              |                              |                        | ~50 SipC <sup>b</sup>                |                                |                        |                 | (75)     |
| <b>Epigallocatechin gallate</b>     |                                              | ~16µg/ml 1 Yops <sup>b</sup> |                        | ~12µg/ml Sips <sup>b</sup>           | ~16µg/ml EspB <sup>b</sup>     |                        |                 | (76)     |
| <b>Sanguinarine chloride</b>        |                                              |                              |                        | ~5 SipA <sup>bf</sup>                |                                |                        |                 | (77)     |
| <b>Obovatol</b>                     |                                              |                              |                        | 19.8 <sup>c</sup>                    |                                |                        |                 | (78)     |
| <b>Thymol</b>                       |                                              |                              |                        | ~0.2 mM SipA <sup>f</sup>            |                                |                        |                 | (79)     |
| <b>TTS29 thiazolidinone</b>         |                                              | ~380 Yops <sup>b</sup>       | ~380 Ysps <sup>b</sup> | ~100 Sips <sup>b</sup>               |                                | ~380 <sup>c</sup>      |                 | (80)     |
| <b>WEN05-03</b>                     |                                              |                              |                        |                                      | ~100 <sup>c</sup>              |                        |                 | (81)     |
| <b>Fluorothiazinon (also CL-55)</b> | ~20µg/ml ExoT <sup>b</sup> ExoY <sup>b</sup> |                              |                        | ~10mg/kg <sup>c</sup>                |                                | ~25 <sup>c</sup>       |                 | (82-84)  |
| <b>(-)-Hopeaphenol</b>              | ~50 ExoS <sup>b</sup>                        | 3.3 YopD <sup>b</sup>        |                        |                                      |                                | ~25 <sup>c</sup>       |                 | (85)     |
| <b>Resveratrol oligomers</b>        |                                              |                              |                        |                                      |                                | ~100 hrpA <sup>e</sup> |                 | (86)     |
| <b>Paeonol</b>                      |                                              |                              |                        | ~95 Sips <sup>b</sup>                |                                |                        |                 | (87)     |
| <b>Syringaldehyde</b>               |                                              |                              |                        | ~180 Sips <sup>b</sup>               |                                |                        |                 | (88)     |
| <b>Fusaric acid</b>                 |                                              |                              |                        | 53.5 SipC <sup>b</sup>               |                                |                        |                 | (89)     |
| <b>Cytosporone B</b>                |                                              |                              |                        | 6.25 SipC <sup>b</sup>               |                                |                        | NE <sup>d</sup> | (90)     |
| <b>Aurodox</b>                      |                                              |                              |                        |                                      | 0.5 ug/mL EspABCD <sub>b</sub> |                        |                 | (91)     |
| <b>W1227933, W1774182</b>           |                                              |                              |                        |                                      |                                | 25 IncA <sup>f</sup>   |                 | (72)     |
| <b>BCD03</b>                        |                                              |                              |                        |                                      |                                | 67.3 <sup>b</sup>      |                 | (92)     |
| <b>α-tocopherol</b>                 | ~10 <sup>c</sup> ExoY <sup>f</sup>           |                              |                        |                                      |                                |                        |                 | (93)     |
| <b>Cinnamaldehyde</b>               |                                              |                              |                        | ~100 <sup>c</sup> SipAB <sup>e</sup> |                                |                        |                 | (94)     |

961 <sup>a</sup> Species/T3SS family: PA: *Pseudomonas aeruginosa*, Ysc: *Yersinia pseudotuberculosis*

962 Ysc, Ysa: *Yersinia enterocolitica* Ysa, SPI-1: *Salmonella enterica* Typhimurium SPI-1,

963 SPI-II: *Salmonella enterica* Typhimurium SPI-II, EPEC/EHEC: Enteropathogenic *E.*

964 *coli*/Enterohemorrhagic *E.coli*, PS: *Pseudomonas syringae*, Fla: flagella. Empty square

965 denotes activity not tested.

966 <sup>b</sup> IC<sub>50</sub> (in µM, unless otherwise indicated) measured using the indicated organism/T3SS

967 family/effector protein in a culture-based secretion assay. If IC<sub>50</sub> data is not available,  
968 either the lowest known inhibitory concentration (indicated by “~”), EC<sub>50</sub> (half maximal  
969 effective concentration), or MIC (minimal inhibitory concentration) are shown.

970 <sup>c</sup> IC<sub>50</sub> (in μM) measured using cell-based, infection assays.

971 <sup>d</sup> No effect observed

972 <sup>e</sup> IC<sub>50</sub> (in μM) measured using a biochemical assay (i.e.-binding assay, enzymatic assay,  
973 qPCR).

974 <sup>f</sup> IC<sub>50</sub> (in μM) measured using translocation assay.

975 \* Phe: Phenoxyacetamide. HQ: hydroxyquinoline. SAH: Salicylidene acylhydrazides.

976

977

978 **Table 3: Bacterial strains used in this study**  
979

| Strain                                | Description                                                                                                                                                                                            | References |
|---------------------------------------|--------------------------------------------------------------------------------------------------------------------------------------------------------------------------------------------------------|------------|
| <i>Y. pseudotuberculosis</i> strains  |                                                                                                                                                                                                        |            |
| Wild type                             | <i>Y. pseudotuberculosis</i> IP2666                                                                                                                                                                    | (95)       |
| <i>tatB::Tn</i> - Bla                 | IP2666 $\Delta YopHEMOJ$<br><i>tatB::TnHimarI</i> insertion; carrying<br>30aa <sub>suff</sub> :: $\beta$ -lactamase TEM1                                                                               | This study |
| Wild type - Bla                       | IP2666 carrying 30aa <sub>suff</sub> :: $\beta$ -lactamase<br>TEM1                                                                                                                                     | This study |
| <i>Pseudomonas aeruginosa</i> strains |                                                                                                                                                                                                        |            |
| Wild type                             | <i>P. aeruginosa</i> PA103                                                                                                                                                                             | (96)       |
| $\Delta exoUT$                        | PA103 $\Delta exoU/\Delta exoT$                                                                                                                                                                        | (97)       |
| PAO1 efflux pump mutant               | PAO1 $\Delta(mexAB-oprM)$ nfxB<br>$\Delta(mexCD-oprJ)$ $\Delta(mexEF-oprN)$<br>$\Delta(mexJKL)$<br>$\Delta(mexXY)$ $\Delta opmH362::pGSV3$ -Spr<br>-exoT'-<br>aacC1::miniCTXexoS(E379A/E381A)-<br>blaM | (28)       |
| <i>Yersinia enterocolitica</i>        |                                                                                                                                                                                                        |            |
| Wild type                             | <i>Y. enterocolitica</i> 8081 serotype O:8                                                                                                                                                             | (98)       |
| pYV40-EGFP-yscD                       | <i>Y. enterocolitica</i> serotype O9 strain E40                                                                                                                                                        | (23)       |



carrying EGFP-yscD

*Salmonella enterica* Typhimurium strains

WT *S. enterica* Typhimurium SL1344 (99)

$\Delta$ *fliC* SL1344  $\Delta$ *fliC* (99)

*Escherichia coli*

*E. coli* DH5 $\alpha$  *E. coli* DH5 $\alpha$  carrying 30aa<sub>suff</sub>:: $\beta$ - This study

lactamase TEM1

*Chlamydia trachomatis* *C. trachomatis* serovar L2 (Joanne Engle)

980

981

982 **Table S1: Solubility of cyclic peptomers**

983

| Compounds  | Solubility ( $\mu\text{M}$ ) |                 |                 | IC <sub>50</sub> |
|------------|------------------------------|-----------------|-----------------|------------------|
|            | PBS                          | DMEM            | M9              |                  |
| 1EpDN 3Ala | 180                          | ND <sup>a</sup> | ND <sup>a</sup> | >1000*           |
| 1EpDN 4Ala | 75                           | ND <sup>a</sup> | ND <sup>a</sup> | >1000*           |
| 1EpDN 5Ala | 127                          | ND <sup>a</sup> | ND <sup>a</sup> | >1000*           |
| 1EpDN 6Ala | 125                          | ND <sup>a</sup> | ND <sup>a</sup> | >1000*           |
| 1EpDN      | 14-17                        | ND <sup>a</sup> | ND <sup>a</sup> | 8.2              |
| 2EpDN      | 12                           | ND <sup>a</sup> | ND <sup>a</sup> | 15.3             |
| 3EpDN      | 18                           | ND <sup>a</sup> | ND <sup>a</sup> | 16               |
| 4EpDN      | 13                           | 12              | 10              | 3.9              |
| 5EpDN      | 13                           | ND <sup>a</sup> | ND <sup>a</sup> | 6.3              |
| 6EpDN      | 1                            | ND <sup>a</sup> | ND <sup>a</sup> | >1000*           |
| 7EpDN      | 26                           | ND <sup>a</sup> | ND <sup>a</sup> | 6.7              |
| 8EpDN      | 1                            | ND <sup>a</sup> | ND <sup>a</sup> | 41.5             |
| 9EpDN      | 10                           | ND <sup>a</sup> | ND <sup>a</sup> | 12.8             |
| 4EpDN 1Sar | ND <sup>a</sup>              | 6               | 4               | 19               |
| 4EpDN 2Sar | ND <sup>a</sup>              | 61              | 61              | ~139.5           |

984

985 \* >1000 indicates IC<sub>50</sub> could not be calculated

986 <sup>a</sup>: Not Determined (ND)

987

988

989

990 **Table S2. Primers used in this study**  
991

| <b>Name</b> | <b>Sequence</b>         | <b>Description</b>                         |
|-------------|-------------------------|--------------------------------------------|
| oHL364      | TACTGGAAACGGTGGCTAATAC  | 16S Forward for <i>Salmonella</i> qPCR     |
| oHL365      | TACCTCACCAACAAGCTAATCC  | 16S Reverse for <i>Salmonella</i> qPCR     |
| oHL362      | GCCAACGACGGTGAAACTA     | fliC Forward for <i>Salmonella</i> qPCR    |
| oHL363      | GCCGTATCGCTGACCTTATATT  | fliC Reverse for <i>Salmonella</i> qPCR    |
| oHL346      | ACGACTCATAATTGGCGATAC   | hilA Forward for <i>Salmonella</i> qPCR    |
| oHL347      | CTGCGATAATCCCTTCACGATAG | hilA Reverse for <i>Salmonella</i> qPCR    |
| oHL348      | GGCGTCTCTATGCACTTATC    | hilD Forward for <i>Salmonella</i> qPCR    |
| oHL349      | GCAGGAAAGTCAGGCGTATAG   | hilD Reverse for <i>Salmonella</i> qPCR    |
| oHL350      | GCAGCAAATTATTACGCCTTCTC | invF Forward for <i>Salmonella</i> qPCR    |
| oHL351      | CTGGTTGACTGAGCGAGTAAAT  | invF Reverse for <i>Salmonella</i> qPCR    |
| oHL352      | ATGCGTTGTCCGGTAGTATTT   | sipC Forward for <i>Salmonella</i> qPCR    |
| oHL353      | TTAAGCGCGCCTCTTTCA      | sipC Reverse for <i>Salmonella</i> qPCR    |
| oHL354      | TCTTGTTATGCAGGAGGTGATG  | sipA Forward for <i>Salmonella</i> qPCR    |
| oHL355      | GTCAACAAGGTGCGTAAGATTG  | sipA Reverse for <i>Salmonella</i> qPCR    |
| BQ89        | CATGACCATCGCCTGATCTT    | dnaB Forward for <i>P. aeruginosa</i> qPCR |
| BQ90        | GTTGTCCTTCCTTCTCCAAC    | dnaB Reverse for <i>P. aeruginosa</i> qPCR |

|        |                                                  |                                                            |
|--------|--------------------------------------------------|------------------------------------------------------------|
| oHL258 | ATGCGGTAATGGACAAGGTC                             | exoT Forward for <i>P. aeruginosa</i> qPCR                 |
| oHL259 | ACTCGCCGTTGGTATAGAGA                             | exoT Reverse for <i>P. aeruginosa</i> qPCR                 |
| oHL282 | CCGGCAGATGTCCATTTC                               | DsbA Forward for <i>P. aeruginosa</i> qPCR                 |
| oHL283 | CTCGACACCCATGCTTTC                               | DsbA Reverse for <i>P. aeruginosa</i> qPCR                 |
| BQ91   | CTCTACACCGGCATTCACTAC                            | exoS Forward for <i>P. aeruginosa</i> qPCR                 |
| BQ92   | CATACCTTGGTCGATCAGCTT                            | exoS Reverse for <i>P. aeruginosa</i> qPCR                 |
| oHL210 | agcgaattcgagctcggtaccATGTCACTCAGTC<br>GTCGC      | Forward primer for 33 amino acid of <i>sufI</i> N terminus |
| oHL217 | tttctgggtgAGGTTGCTGAGTACTACTAG                   | Reverse primer for 33 amino acid of <i>sufI</i> N terminus |
| oHL218 | tcagcaacctCACCCAGAAACGCTGGTG                     | Forward primer for $\beta$ -lactamase gene                 |
| oHL219 | tctagaggatccccgggtaccTTACCAATGCTTA<br>ATCAGTGAGG | Reverse primer for $\beta$ -lactamase gene                 |

992

993

994

995 **Figure legends**

996

997 **Figure 1: Stereochemistry scan of cyclic peptomers results in a more potent**

998 **derivative, 4EpDN. (A)** Structures of 1EpDN stereoisomers. Isomers were generated

999 from different combination of four side chains at position 3 to 6. Numbers preceding

1000 compounds were used to distinguish the different isomers and the conformation of the

1001 four side chains. D-amino acid side chain is shown in red. **(B)** WT *P. aeruginosa* PA103

1002 was grown under T3SS-inducing conditions with increasing concentrations of cyclic

1003 peptomer isomers. Secretion of T3SS cargo into the culture supernatant was assessed by

1004 precipitating secreted proteins and visualizing them with Coomassie blue. ExoU band

1005 intensities were quantified and normalized to that of the DMSO control. The results are

1006 from at least two independent experiments. Nonlinear curve fitting is shown to depict the

1007 trend of inhibition.

1008

1009 **Figure 2: Sarcosine replacement of 4EpDN at position 1 or 2 eliminates activity. (A)**

1010 Structures of 4EpDN and its derivatives, 4EpDN 1Sar and 4EpDN 2Sar. D-amino acid

1011 side chain is shown in red. **(B)** WT *P. aeruginosa* PA103 was grown under T3SS-

1012 inducing conditions with increasing concentrations of compounds. Secretion of T3SS

1013 cargo into the culture supernatant was assessed on SDS-PAGE gel. ExoU band intensities

1014 were visualized with Coomassie blue, quantified and normalized to that of the DMSO

1015 control. The results are from at least two independent experiments.

1016

1017 **Figure 3: Effect of cyclic peptomers on secretion of *Yersinia* Ysa T3SS substrates.** *Y.*  
1018 *enterocolitica* serotype O:8 was grown under T3SS-inducing conditions with increasing  
1019 concentrations of cyclic peptomer isomers, 4EpDN (A) and 4EpDN 2Sar (B). Secretion  
1020 of T3SS cargo into the culture supernatant was assessed by precipitating secreted proteins  
1021 and visualizing them with Coomassie blue. YspF band intensities were quantified and  
1022 normalized to that of the DMSO control. Representative gel images and quantification of  
1023 YspF are shown. The results are from two independent experiments.

1024

1025 **Figure 4: Cyclic peptomers inhibit the *Salmonella* SPI-1 T3SS.** *Salmonella enterica*  
1026 Typhimurium was grown with increasing concentrations of cyclic peptomer isomers.  
1027 Secretion of SPI-1 T3SS cargo into the culture supernatant was assessed by precipitating  
1028 secreted proteins and visualizing them with Coomassie blue. SipA and SipC band  
1029 intensities were quantified and normalized to that of the DMSO control. The experiments  
1030 were carried out without the detergent Tween 20 (A), or with Tween 20 (B). A  $\Delta$ SPI-1  
1031 *Salmonella* mutant and INP0007, a known SPI-1 inhibitor (60), were used as controls.  
1032 The results are from at least two independent experiments.

1033

1034 **Figure 5: The cyclic peptomer 4EpDN disrupts localization of the *Yersinia* T3SS**  
1035 **basal body component YscD.** *Y. enterocolitica* expressing YscD-EGFP was grown  
1036 under T3SS inducing condition (low  $\text{Ca}^{2+}$ ) in the presence of 9  $\mu\text{M}$  cyclic peptomers, 50  
1037  $\mu\text{M}$  INP007, or DMSO. High  $\text{Ca}^{2+}$  media was used as a non-secreting control. (A)  
1038 Histogram showing the frequency of YscD puncta/cell. (B) Average number of  
1039 puncta/cell after treatment  $\pm$  standard error of the mean. Data represents three

1040 independent experiments. One-way ANOVA with Dunnett's multiple-comparison test  
1041 was used. \*\*\*\*,  $P < 0.0001$ ; ns: not significant.

1042

1043 **Figure 6: Cyclic peptomers do not affect transcription of T3SS genes in *P.***

1044 *aeruginosa*. *P. aeruginosa* PA103 (A) or PA01 (B) was grown in low calcium media in  
1045 the presence of 60 $\mu$ M cyclic peptomers or DMSO. Samples were collected 3 hrs after  
1046 induction for qPCR analysis. The phenoxyacetamide MBX1641 (53), a known T3SS  
1047 inhibitor predicted to inhibit type III secretion by binding to the T3SS needle subunit  
1048 (28), was used as a control. Data were from three replicates, analyzed by one-way  
1049 ANOVA with Dunnett's multiple-comparison test. \*\*,  $P < 0.01$ .

1050

1051 **Figure 7: The cyclic peptomer 4EpDN inhibits secretion of the effector protein**

1052 **ExoS, but not the regulator ExsE.** PA01 carrying ExoS-Bla was grown in T3S  
1053 inducing condition on the presence of 60 $\mu$ M cyclic peptomers or DMSO. A. Secretion of  
1054 ExoS into the culture supernatant and synthesis of ExoS in the cell pellets were assessed  
1055 by Western Blot using a  $\beta$ -lactamase antibody. B. In the same samples, Western blot was  
1056 carried out for ExsE. ExsE in the supernatant was observed and quantified while ExsE in  
1057 the cell pellets was undetectable. Data were from at least two independent experiments.  
1058 One-way ANOVA with Dunnett's multiple-comparison test was used. \*,  $P < 0.05$ ; ns: not  
1059 significant, compared to DMSO.

1060

1061 **Figure 8: Cyclic peptomers do not affect the twin arginine translocation (Tat)**

1062 **system.** (A) *Y. pseudotuberculosis* expressing a SufI- $\beta$ -lactamase Tat secretion reporter

1063 incubated in the presence of penicillin G will only grow if the Tat secretion system  
1064 remains functional. **(B)** *Y. pseudotuberculosis* SufI- $\beta$ -lactamase reporters were treated  
1065 with the Tat inhibitors Bay 11-7082, N-Phenyl maleimide, or DMSO, and culture optical  
1066 density was measured. WT refers to bacteria expressing a functional Tat secretion  
1067 system. A mutant strain with a transposon insertion in the *tatB* gene serves as a control.  
1068 **(C)** The same assay as in (B) was repeated in the presence of cyclic peptomers or DMSO.  
1069 The result was from two independent replicates.

1070

1071 **Figure 9. The cyclic peptomer 4EpDN inhibits *Chlamydia* infection.** **(A)** HeLa cells  
1072 were infected with *C. trachomatis* L2 at a multiplicity of infection (MOI) of three (left  
1073 hand panel) or one (right hand panel) in the presence of 9  $\mu$ M cyclic peptomers, 30  
1074  $\mu$ M INP0400, or DMSO. Cells were stained for the *Chlamydia* major outer membrane  
1075 protein (MOMP) and nucleic acids (DAPI), and imaged after 24 hrs of infection to  
1076 determine the number of infected cells (primary infection). **(B-C)** Infectious elementary  
1077 bodies (EB) were harvested after 48hrs of HeLa cell infection in the presence of  
1078 inhibitors and used to infect fresh HeLa cells without applying inhibitors (secondary  
1079 infection). After 24 hrs, cells were imaged as in **(A)**. Representative images **(B)** and  
1080 infectious units/mL **(C)** are shown from three to four independent experiments. One-way  
1081 ANOVA with Dunnett's multiple-comparison test was used. \*\*,  $P < 0.01$ , \*\*\*\*,  $P$   
1082  $< 0.0001$ , ns: not significant.

1083

1084 **Figure S1: 1EpDN alanine/Sarcosine scan suggests peptoid sidechains are important**  
1085 **for biological activity.** **(A)** Structures of 1EpDN alanine derivatives. D-form of side



1086 chain is shown in red. **(B)** WT *P. aeruginosa* PA103 was grown under T3SS-inducing  
1087 conditions with increasing concentrations of cyclic peptomers. Secretion of T3SS cargo  
1088 into the culture supernatant was assessed by precipitating secreted proteins and  
1089 visualizing them with Coomassie blue. ExoU band intensities were quantified and  
1090 normalized to that of the DMSO control. The results are from at least two independent  
1091 experiments. Nonlinear curve fitting is shown to depict the trend of inhibition.

1092

1093 **Figure S2: Secretion of *Salmonella* T3SS substrate in the presence of non-ionic**  
1094 **detergents.** **(A)** *Salmonella enterica* Typhimurium was grown in LB with increasing  
1095 concentrations of NP-40, Tween 20, or Triton X-100. Secretion of SPI-1 T3SS effector  
1096 SipC into the culture supernatant was assessed by precipitating secreted proteins and  
1097 visualizing them with Coomassie blue. **(B)** Secretion of SipC in the presence of  
1098 increasing concentrations of Tween 20 or Triton X-100 was detected by Western Blot.  
1099 0.003% Tween-20 is the highest concentration of Tween-20 that resulted in little effect  
1100 on secretion of SipC.

1101

1102 **Figure S3: Cyclic peptomers do not affect secretion of flagellar proteins.** *Salmonella*  
1103 *enterica* Typhimurium was grown in LB with increasing concentrations of cyclic  
1104 peptomers. Secretion of flagellar structural proteins FliC and FliD were assessed by  
1105 precipitating the secreted proteins and visualizing them with Coomassie blue. A  $\Delta$ *fliC*  
1106 mutant and azithromycin (100), which inhibits flagellin secretion, were used as controls.  
1107 The SPI-1 mutant and WT *Salmonella* were both tested, as flagella substrates can be  
1108 secreted through both flagellar and SPI-1 T3SS systems.

1109

1110 **Figure S4: Relationship between solubility and activity of cyclic peptomers.** IC<sub>50</sub> of  
1111 stereoisomers and their solubility (table S1) were plotted on a log<sub>10</sub> scale. Average  
1112 solubility was used when the solubility was measured in different conditions.

1113

1114 **Figure S5: Cyclic peptomers do not affect transcription of T3SS genes in**  
1115 *Salmonella*. *Salmonella enterica* Typhimurium was grown in LB with 300 mM NaCl in  
1116 the presence of 9 μM cyclic peptomers or DMSO. Samples were taken 2 hrs (A) and 4  
1117 hrs (B) after addition of compounds at 37°C and expression of flagellar (*fliC*) and  
1118 injectisome T3SS (*hilA*, *hilD*, *invF*, *sipC*, *sipA*) genes were assessed using qPCR. Data  
1119 are from two replicates, analyzed by one-way ANOVA showing no significant difference  
1120 between control and treatments.

1121

1122

1123 **Figure S6: Effect of cyclic peptomers on HeLa cells.** HeLa cells were incubated with  
1124 compounds for 48 hrs. Cells were then stained with: (A) Stain Set 1-Hoechst, FITC-alpha  
1125 tubulin, rhodamine-phalloidin (actin), and Calnexin (ER induced protein); or (B) Stain set  
1126 2-Hoechst, EdU-rhodamine (S-phase detection), anti-Phosphohistone H3 (mitosis  
1127 marker), and GM130 (Golgi matrix protein). Representative images of cells treated with  
1128 different concentrations of 4EpDN or DMSO are shown. (C) Quantification of all cell  
1129 features for 4EpDN-treated cells. The total CP score is the square root of sum of square  
1130 of the difference between treatment and DMSO for all measured features.

1131

1132 **Figure S7:** Characterization of cyclic peptomers. Drawn structures, SMILE structures,

1133 molecular weight, LCMS Spectra, and  $^1\text{H-NMR}$  Spectra are shown.

1134

1135

**A**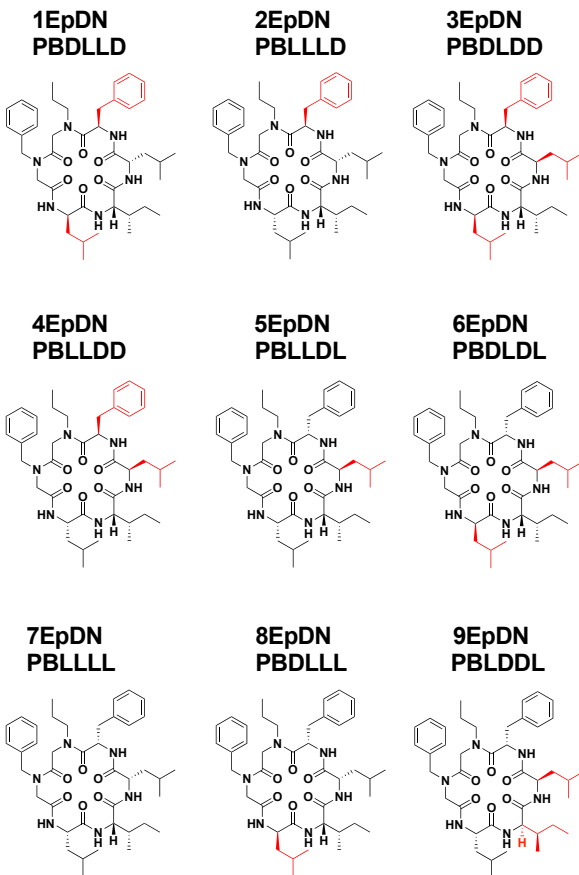**B**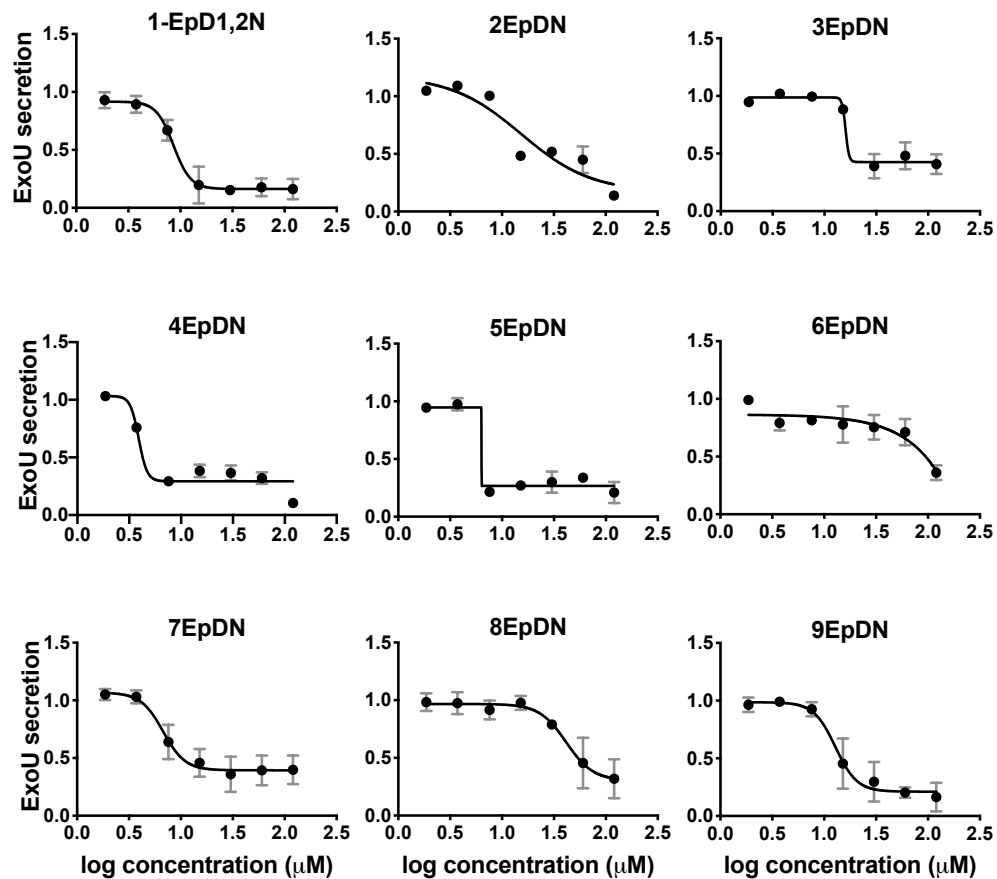

**A****4EpDN**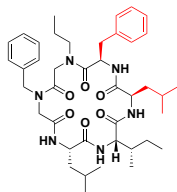**4EpDN 1Sar**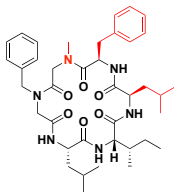**4EpDN 2Sar**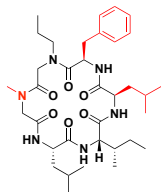**B****4EpDN**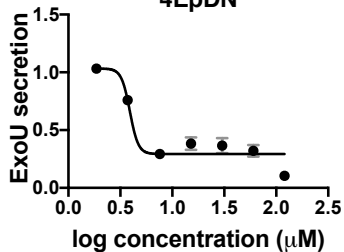**4EpDN 1Sar**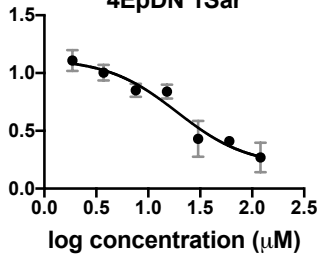**4EpDN 2Sar**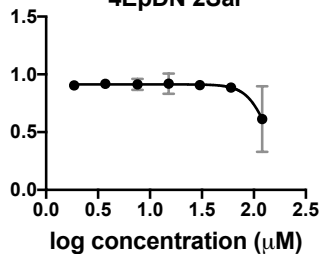

A

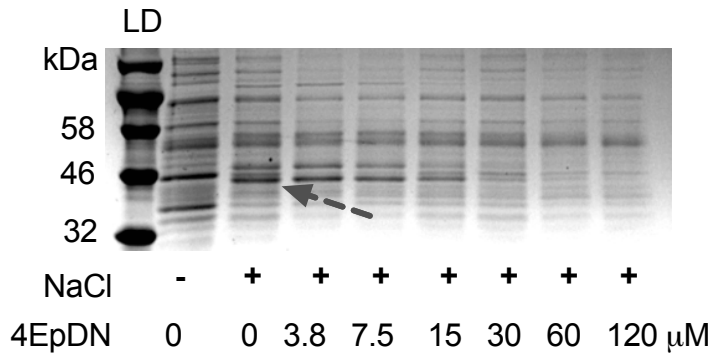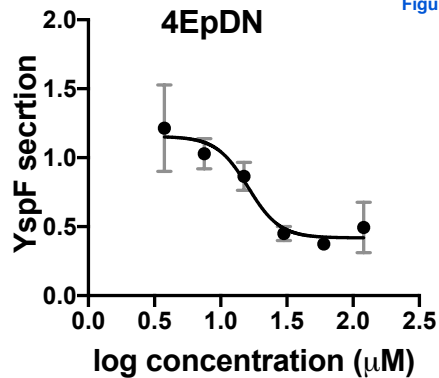

B

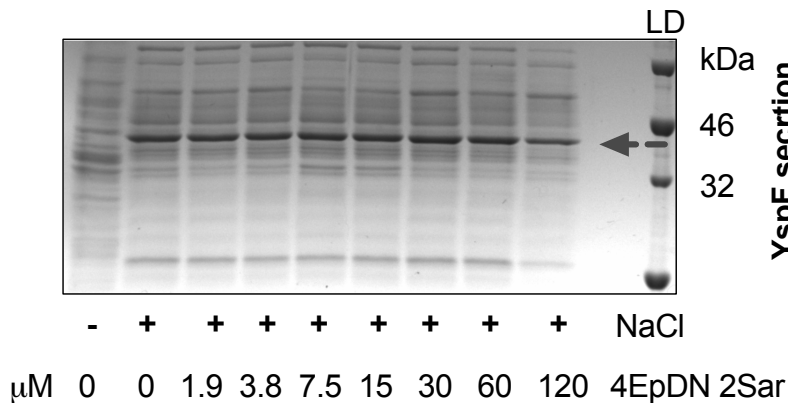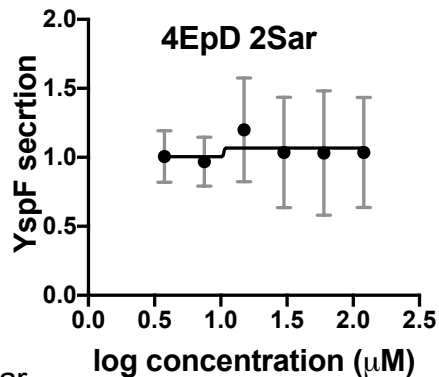

■ INP0007 100 $\mu$ M    ◆  $\Delta$ SPI-1

**No Tween 20**

**A**

4EpDN

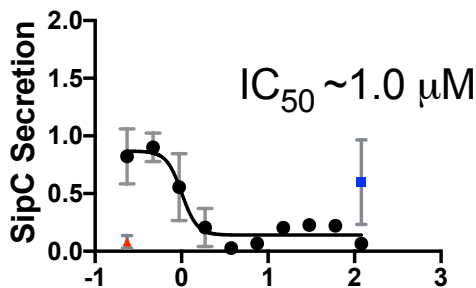

4EpDN 2Sar

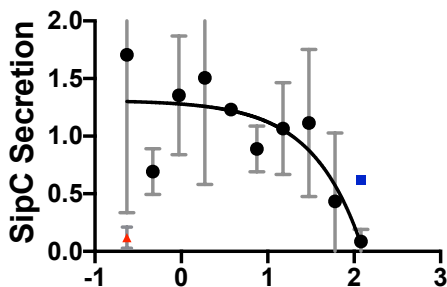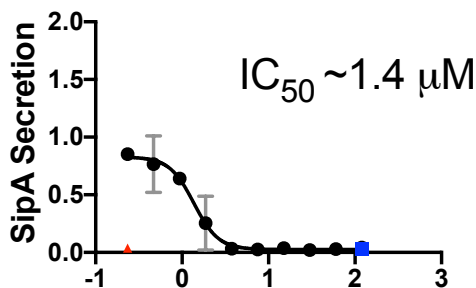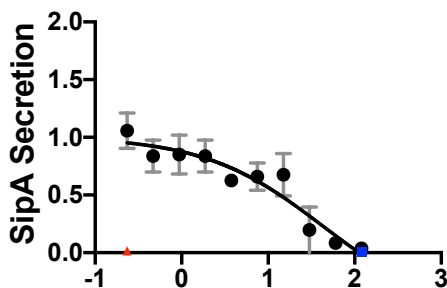

**B**

**With Tween 20 (0.003%)**

4EpDN

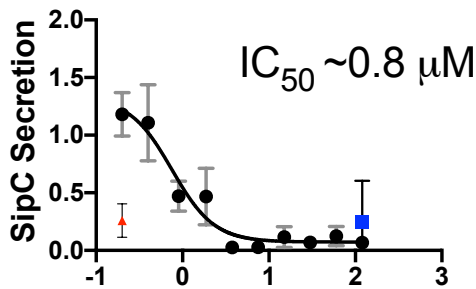

4EpDN 2Sar

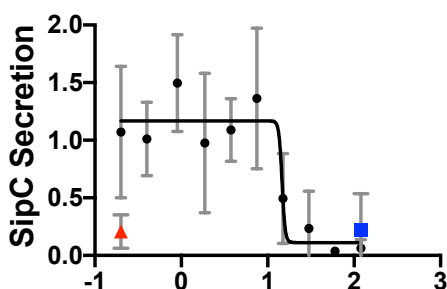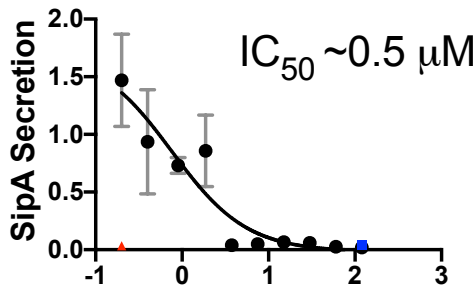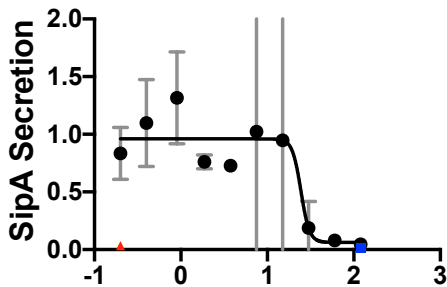

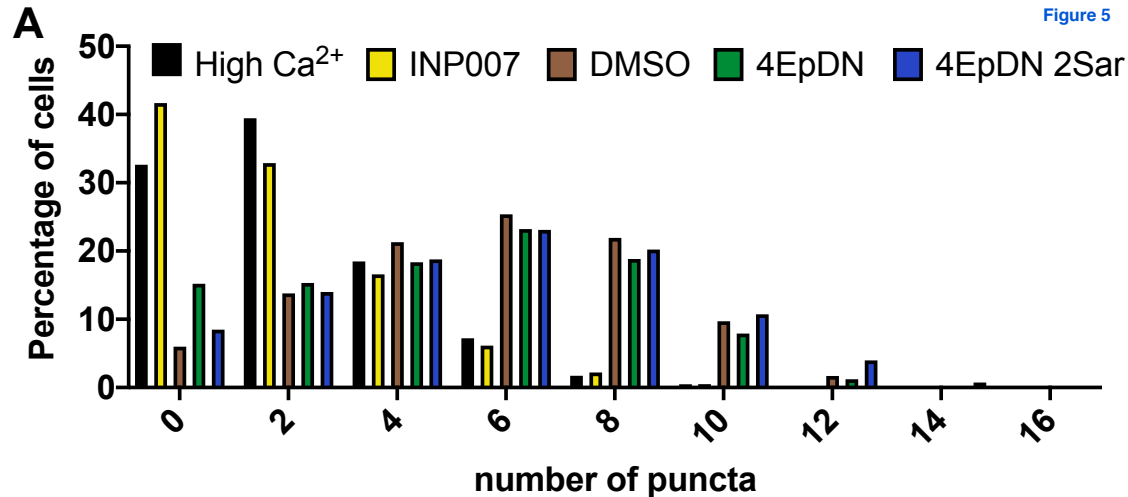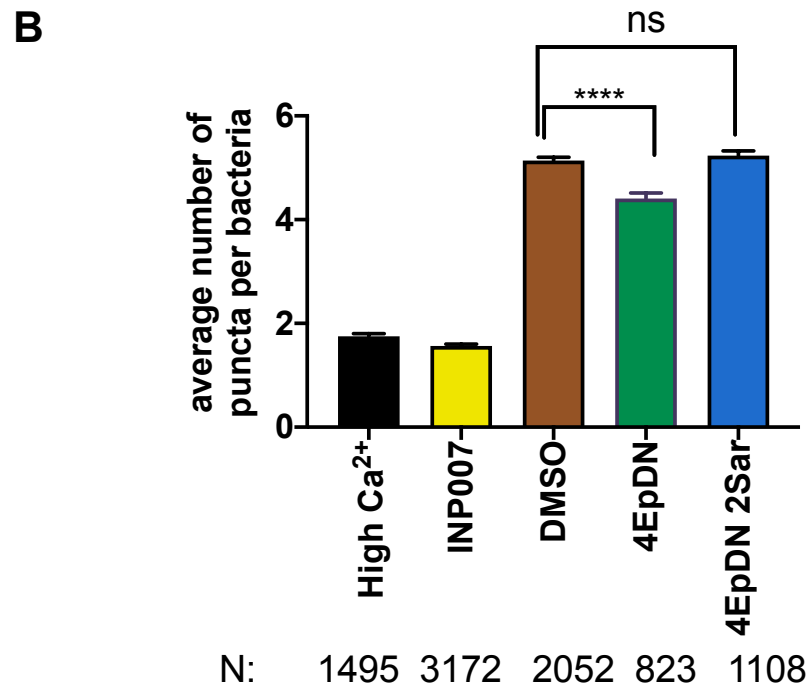



**A.**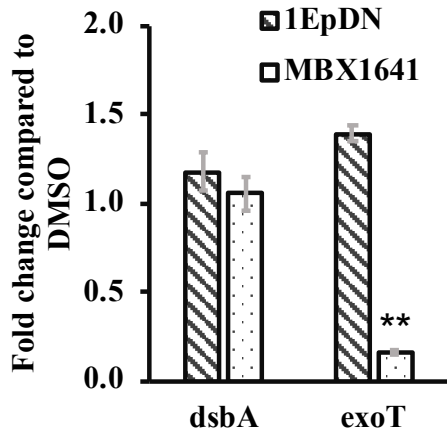**B.**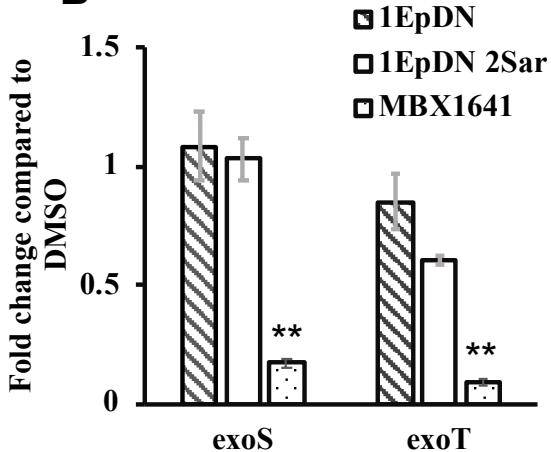

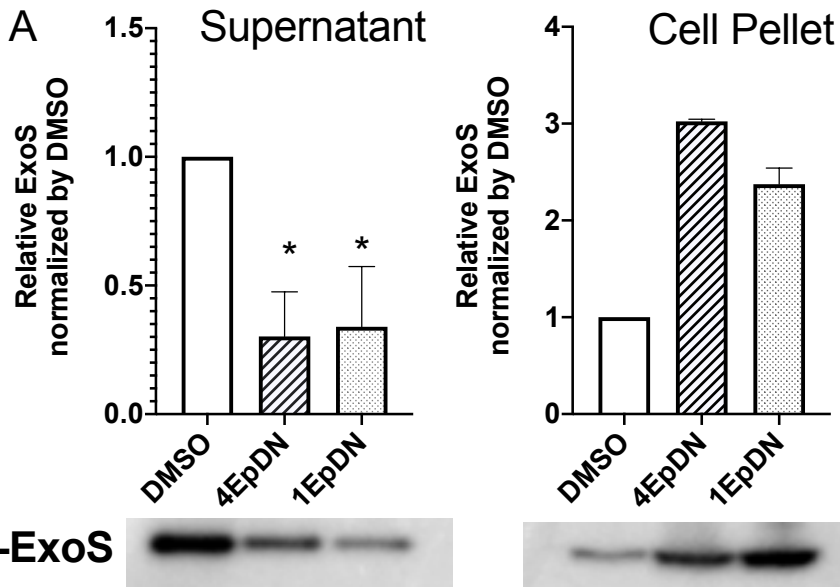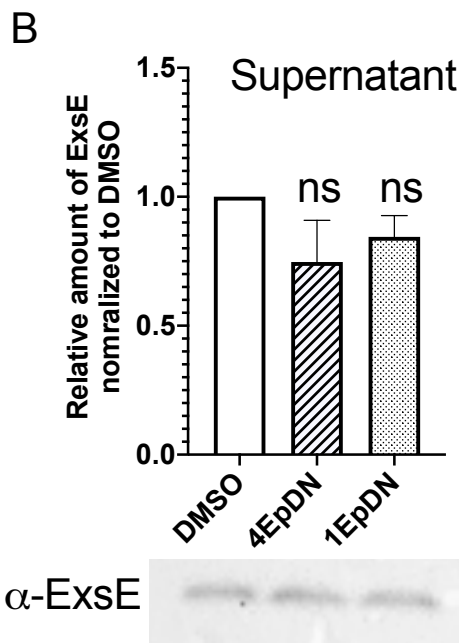

Figure 7

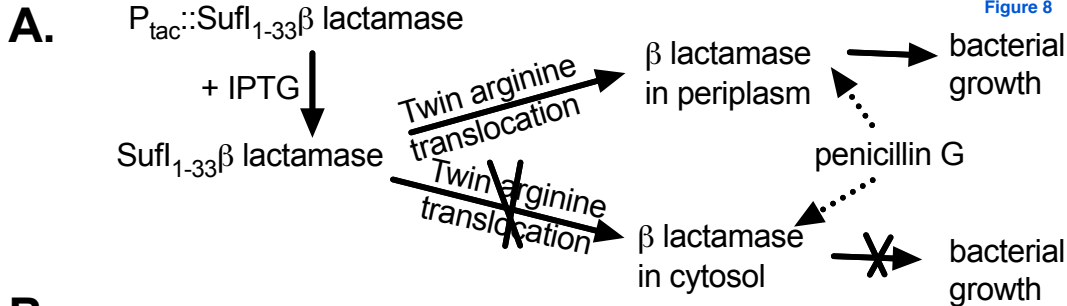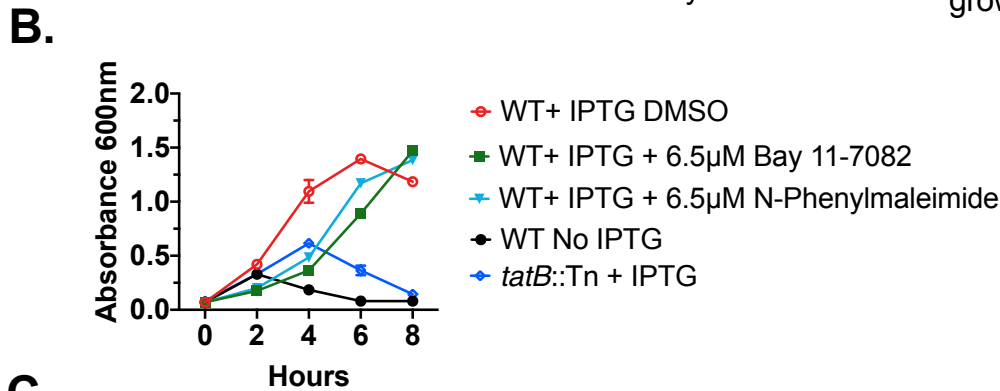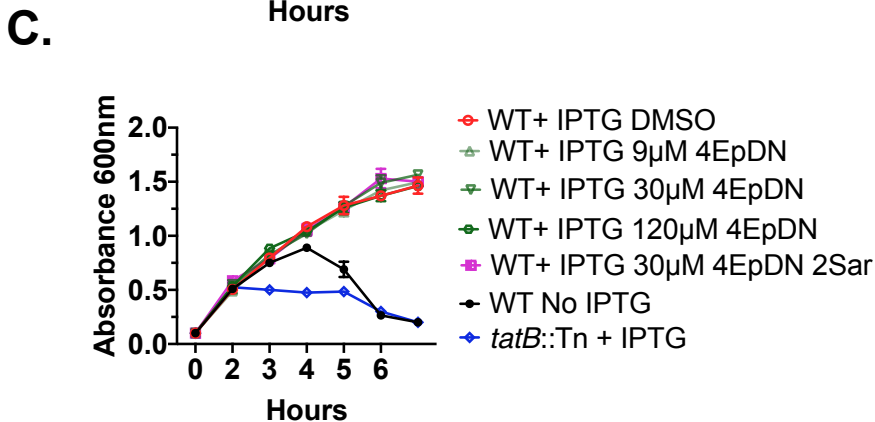

A

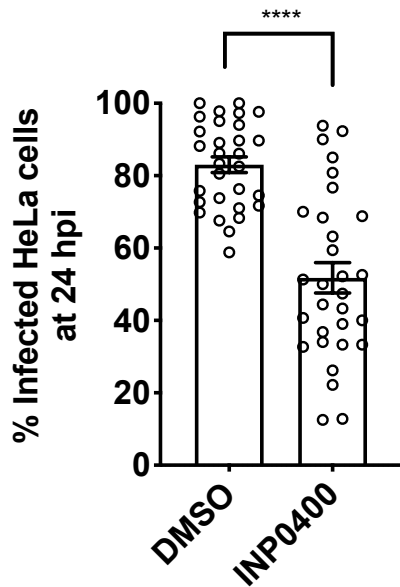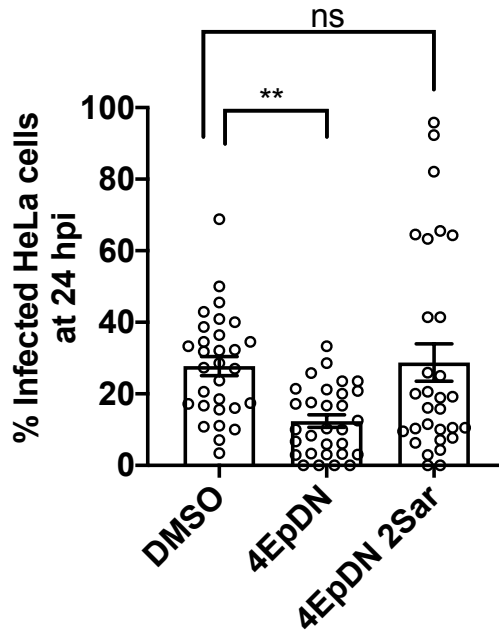

B

*Chlamydia* MOMP  
DAPI

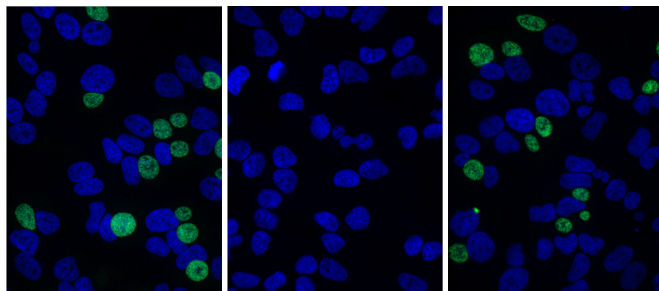

DMSO

4EpDN

4EpDN 2Sar

C

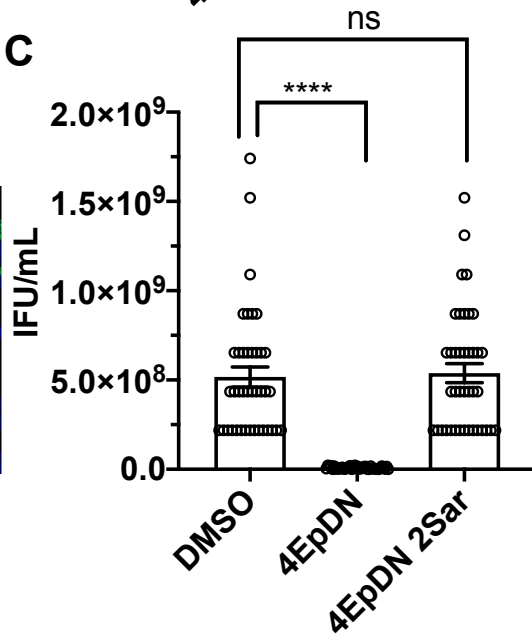

Source: https://www.biorxiv.org/content/10.1101/2020.08.03.235622v1.full.pdf
